# Supplementary material for: Construction of N-1H,1H-perfluoroalkylated peptide bonds
Source: Royal Society of Chemistry journal article supplement (doi:10.1039/b712617d), 2007-10-18

## Construction of *N*-1H, 1H-perfluoroalkylated peptide bonds

Changqing Lu and Darryl D. DesMarteau

Department of Chemistry, Clemson University, Clemson, SC 29634, USA

*E-mail: fluorin@clemson.edu*

### 1. Experimental procedure for the synthesis of **2** (n = 0)

(L)Phenylalanine methyl ester hydrochloride (4.314 g, 20.00 mmol) was suspended in CH<sub>2</sub>Cl<sub>2</sub> (100 mL). Water (100 mL) and Na<sub>2</sub>CO<sub>3</sub> (14.0 g) were added. The mixture was stirred for 30 min. The clear organic layer was separated. NaHCO<sub>3</sub> (2.016 g, 24.00 mmol), water (100 mL) and trifluoroethylating agent CF<sub>3</sub>CH<sub>2</sub>I(C<sub>6</sub>H<sub>5</sub>)N(SO<sub>2</sub>CF<sub>3</sub>)<sub>2</sub> (12.48 g, 22.00 mmol) were added with stirring at room temperature. After 4 h, the CH<sub>2</sub>Cl<sub>2</sub> layer was again separated and washed with 3×100 mL of water. The organic solvent was evaporated. The obtained residue was subjected to column chromatography using 10-40% acetone in n-hexanes. After evaporation of organic solvents, the obtained ester intermediate was stirred in 80 mL of 1.0 M NaOH aqueous solution for 16 h. The aqueous solution was then cooled in an ice bath and acidified with conc. HCl to pH 4.5. The formed white precipitate was filtered and lyophilized to yield 4.390 g (17.76 mmol, 88.8 %) of compound **1** (n = 0).

Compound **1** (n = 0) (2.472 g, 10.00 mmol), (L)leucine methyl ester hydrochloride (1.854 g, 10.00 mmol), HOBt (1.486 g, 11.00 mmol), and EDAC•HCl (2.109 g, 11.00 mmol) were suspended in CH<sub>2</sub>Cl<sub>2</sub> (100 mL). The reaction mixture was stirred and cooled at 0 °C. DIEA (3.48 mL, 20.0 mmol) was added in one portion through a syringe. The reaction was continued at 0 °C for 2 h and at room temperature for 14 h. The reaction mixture was then washed with 100 mL of 0.5 M HCl, 100 mL of 0.1 M NaHCO<sub>3</sub>, and 100 mL of H<sub>2</sub>O respectively. The organic layer was separated, and the solvent was evaporated. The obtained crude product was subjected to column chromatography with 10–30% acetone in n-hexanes to yield 3.418 g (9.129 mmol, 91.3%) of compound **2** (n = 0).

## 2. Experimental procedure for the synthesis of **3**

*N*<sup>α</sup>-phthaloyl glycine acid chloride (2.683 g, 12.00 mmol) was dissolved in 20 mL of dry CH<sub>3</sub>CN. Pyridine (2.5 mL) was added through a syringe. Compound **2** (n = 0) (3.744 g, 10.00 mmol) dissolved in 20 mL of dry CH<sub>3</sub>CN was added to above solution with stirring. The reaction mixture was refluxed for 4 h. The solvent was then evaporated. The obtained residue was dissolved in ethyl acetate (40 mL) and washed with H<sub>2</sub>O (40 mL) for 3 times. The organic layer was separated and the solvent was evaporated. The obtained residue was subjected to column chromatography with 10-40% acetone in n-hexanes. The desired product compound **3** was obtained (4.897 g, 8.720 mmol, 87.2%).

## 3. Experimental procedure for the synthesis of **4** (n = 0)

*N*<sup>α</sup>-Fmoc-glycine acid chloride (1.579 g, 5.00 mmol) was dissolved in 15 mL of dry CH<sub>3</sub>CN. Compound **2** (n = 0) (3.744 g, 10.00 mmol) dissolved in 20 mL of dry CH<sub>3</sub>CN was added to above solution with stirring. The reaction mixture was refluxed for 4 h. The solvent was then evaporated. The obtained residue was dissolved in ethyl acetate (40 mL) and washed with 0.5 M NaHCO<sub>3</sub> (40 mL) twice and H<sub>2</sub>O (40 mL) once. The organic layer was separated and the solvent was evaporated. The obtained residue was subjected to column chromatography with 10-40% acetone in n-hexanes. The desired product compound **4** (n = 0) was obtained (2.717 g, 4.157 mmol, 83.1%).

## 4. Experimental procedure for the synthesis of **5**

Compound **4** (n = 0) (1.550 g, 2.375 mmol) was dissolved in 20 mL of 20% 4-(aminomethyl) piperidine in CHCl<sub>3</sub>. The solution was stirred at room temperature for 3 h, then washed with H<sub>2</sub>O (20 mL) twice and extracted with a phosphate buffer of pH 5.4 (20 mL) twice. The organic layer was separated and dried using anhydrous Na<sub>2</sub>SO<sub>4</sub>, and the solvent was evaporated. The obtained residue was dissolved in 30 mL of dry CH<sub>3</sub>CN. *N*<sup>α</sup>-Fmoc-glycine acid chloride (0.750 g, 2.375 mmol) was then added. The reaction mixture was refluxed for 4 h. The solvent was then evaporated. The obtained residue was dissolved in ethyl acetate (40 mL) and washed with 0.5 M NaHCO<sub>3</sub> (40 mL) twice and H<sub>2</sub>O (40 mL) once. The organic layer was separated and the solvent was evaporated. The obtained residue was subjected to column chromatography with 10-40%

acetone in n-hexanes. The intermediate product FmocGlyGlyCF<sub>3</sub>CH<sub>2</sub>(L)Phe(L)LeuOMe was obtained (0.925 g, 1.301 mmol, 54.8%).

The intermediate product FmocGlyGlyCF<sub>3</sub>CH<sub>2</sub>(L)Phe(L)LeuOMe (0.397 g, 0.559 mmol) was dissolved in 15 mL of 20% 4-(aminomethyl)piperidine in CHCl<sub>3</sub>. The solution was stirred at room temperature for 3 h, then washed with H<sub>2</sub>O (20 mL) twice and extracted with a phosphate buffer of pH 5.4 (20 mL) twice. The organic layer was separated and dried using anhydrous Na<sub>2</sub>SO<sub>4</sub>, and the solvent was evaporated. The obtained residue was dissolved in 25 mL of CH<sub>2</sub>Cl<sub>2</sub>. Then *N*<sup>α</sup>-Boc-(L)tyrosine (0.157 g, 0.559 mmol), HOBt (0.080 g, 0.590 mmol), and EDC·HCl (0.113 g, 0.590 mmol) were added. The reaction mixture was stirred and cooled in an ice bath. DIEA (1.50 mL, 8.61 mmol) was added in one portion through a syringe. The reaction was continued at 0 °C for 2 h and at room temperature for 24 h. The reaction mixture was then washed with 30 mL of 0.5 M HCl, 30 mL of 0.1 M NaHCO<sub>3</sub>, and 30 mL of H<sub>2</sub>O respectively. The organic layer was separated, and the solvent was evaporated. The obtained crude product was subjected to column chromatography with 20–50% acetone in n-hexanes to yield 0.211 g (0.281 mmol, 50.3%) of compound **5**.

## 5. HRMS and NMR spectra of **3**

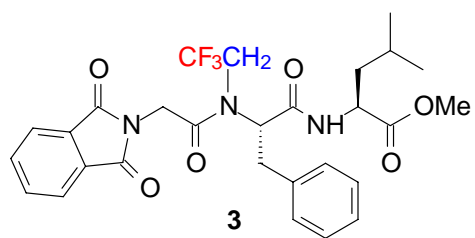

## Single Mass Analysis

Tolerance = 10.0 PPM / DBE: min = -1.5, max = 100.0

Selected filters: None

Monoisotopic Mass, Even Electron Ions

94 formula(e) evaluated with 2 results within limits (all results (up to 1000) for each mass)

Elements Used:

C: 0-50 H: 0-80 N: 2-4 O: 5-7 F: 3-3 Na: 0-1

Changqing Lu, Lu\_01

Mass Spec Lab, SCS, University of Illinois

Qtof\_17790 37 (2.625) AM (Cen,3, 80.00, Ar,12000.0,716.46,0.70,LS 3); Sm (SG, 2x5.00)

Q-tof  
1: TOF MS ES+  
2.05e3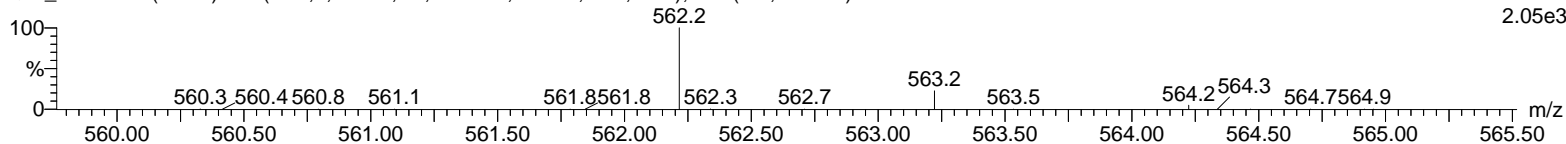

Minimum: -1.5  
Maximum: 5.0 10.0 100.0

| Mass     | Calc. Mass | mDa  | PPM  | DBE  | i-FIT | Formula             |
|----------|------------|------|------|------|-------|---------------------|
| 562.2159 | 562.2165   | -0.6 | -1.1 | 13.5 | 35.4  | C28 H31 N3 O6 F3    |
|          | 562.2141   | 1.8  | 3.2  | 10.5 | 22.3  | C26 H32 N3 O6 F3 Na |

PhthGly-CF<sub>3</sub>CH<sub>2</sub>(L)Phe(L)LeuOMe

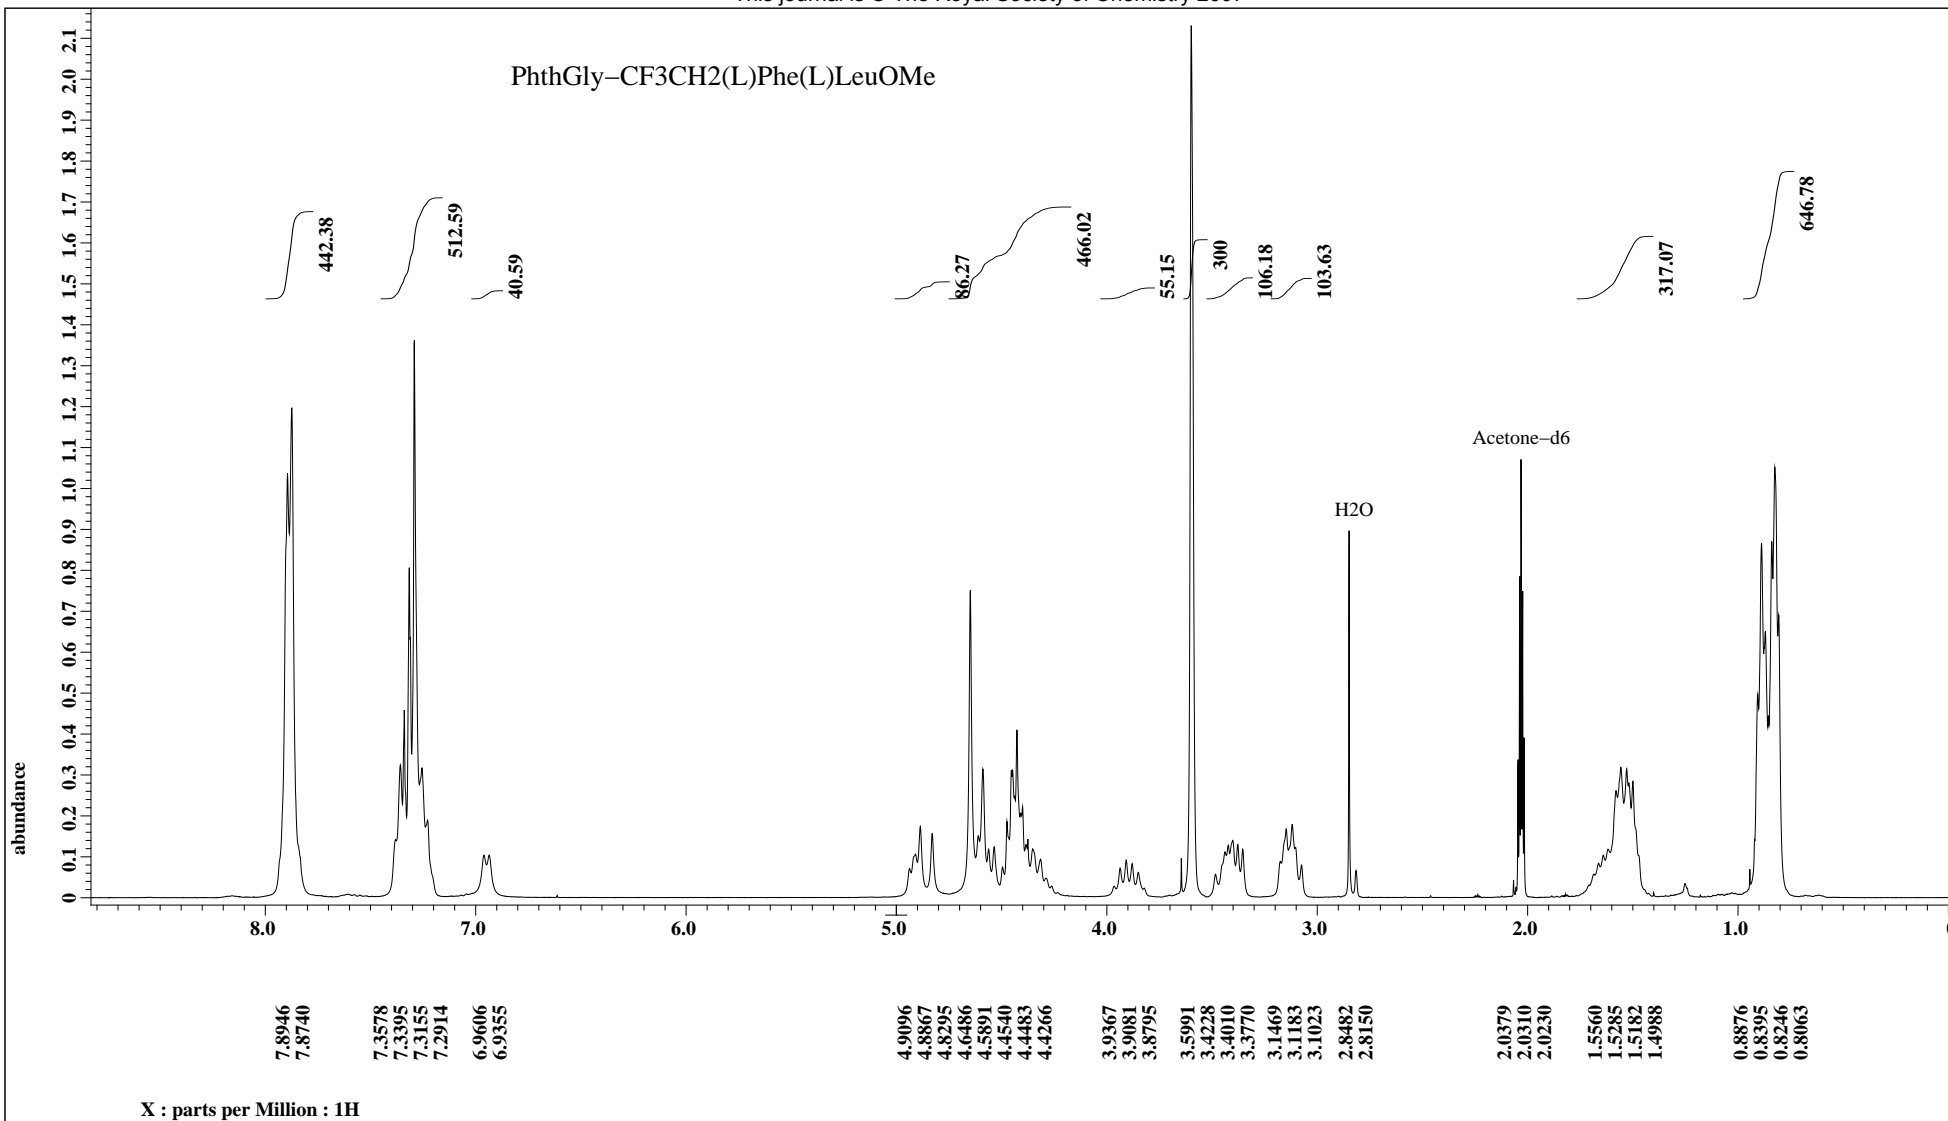

|               |                                                   |                |                          |                  |                 |
|---------------|---------------------------------------------------|----------------|--------------------------|------------------|-----------------|
| Filename      | = Lu_PhthGly-CF <sub>3</sub> CH <sub>2</sub> (L)P | Field_strength | = 7.0586013[T] (300[MHz] | Total_scans      | = 32            |
| Author        | = Delta                                           | X_acq_duration | = 2.90717696[s]          | X_90_width       | = 13.3[us]      |
| Experiment    | = single_pulse.ex2                                | X_domain       | = 1H                     | X_acq_time       | = 2.90717696[s] |
| Sample_id     | = 1                                               | X_freq         | = 300.52965592[MHz]      | X_angle          | = 45[deg]       |
| Solvent       | = ACETONE-D6                                      | X_offset       | = 5[ppm]                 | X_atn            | = 3[dB]         |
| Creation_time | = 19-JUL-2007 16:49:36                            | X_points       | = 16384                  | X_pulse          | = 6.65[us]      |
| Revision_time | = 6-AUG-2007 17:04:11                             | X_prescans     | = 1                      | Irr_mode         | = Off           |
| Current_time  | = 6-AUG-2007 17:04:54                             | X_resolution   | = 0.34397631[Hz]         | Tri_mode         | = Off           |
| Comment       | = single_pulse                                    | X_sweep        | = 5.63570784[kHz]        | Dante_presat     | = FALSE         |
| Data_format   | = 1D_COMPLEX                                      | Irr_domain     | = 1H                     | Initial_wait     | = 1[s]          |
| Dim_size      | = 13107                                           | Irr_freq       | = 300.52965592[MHz]      | Recvr_gain       | = 38            |
| Dim_title     | = 1H                                              | Irr_offset     | = 5[ppm]                 | Relaxation_delay | = 2[s]          |
| Dim_units     | = [ppm]                                           | Tri_domain     | = 1H                     | Repetition_time  | = 4.90717696[s] |
| Dimensions    | = X                                               | Tri_freq       | = 300.52965592[MHz]      | Temp_get         | = 21.1[dC]      |
| Site          | = ECX 300                                         | Tri_offset     | = 5[ppm]                 |                  |                 |
| Spectrometer  | = DELTA2_NMR                                      | Clipped        | = FALSE                  |                  |                 |
|               |                                                   | Mod_return     | = 1                      |                  |                 |
|               |                                                   | Scans          | = 32                     |                  |                 |

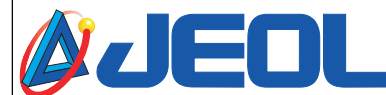

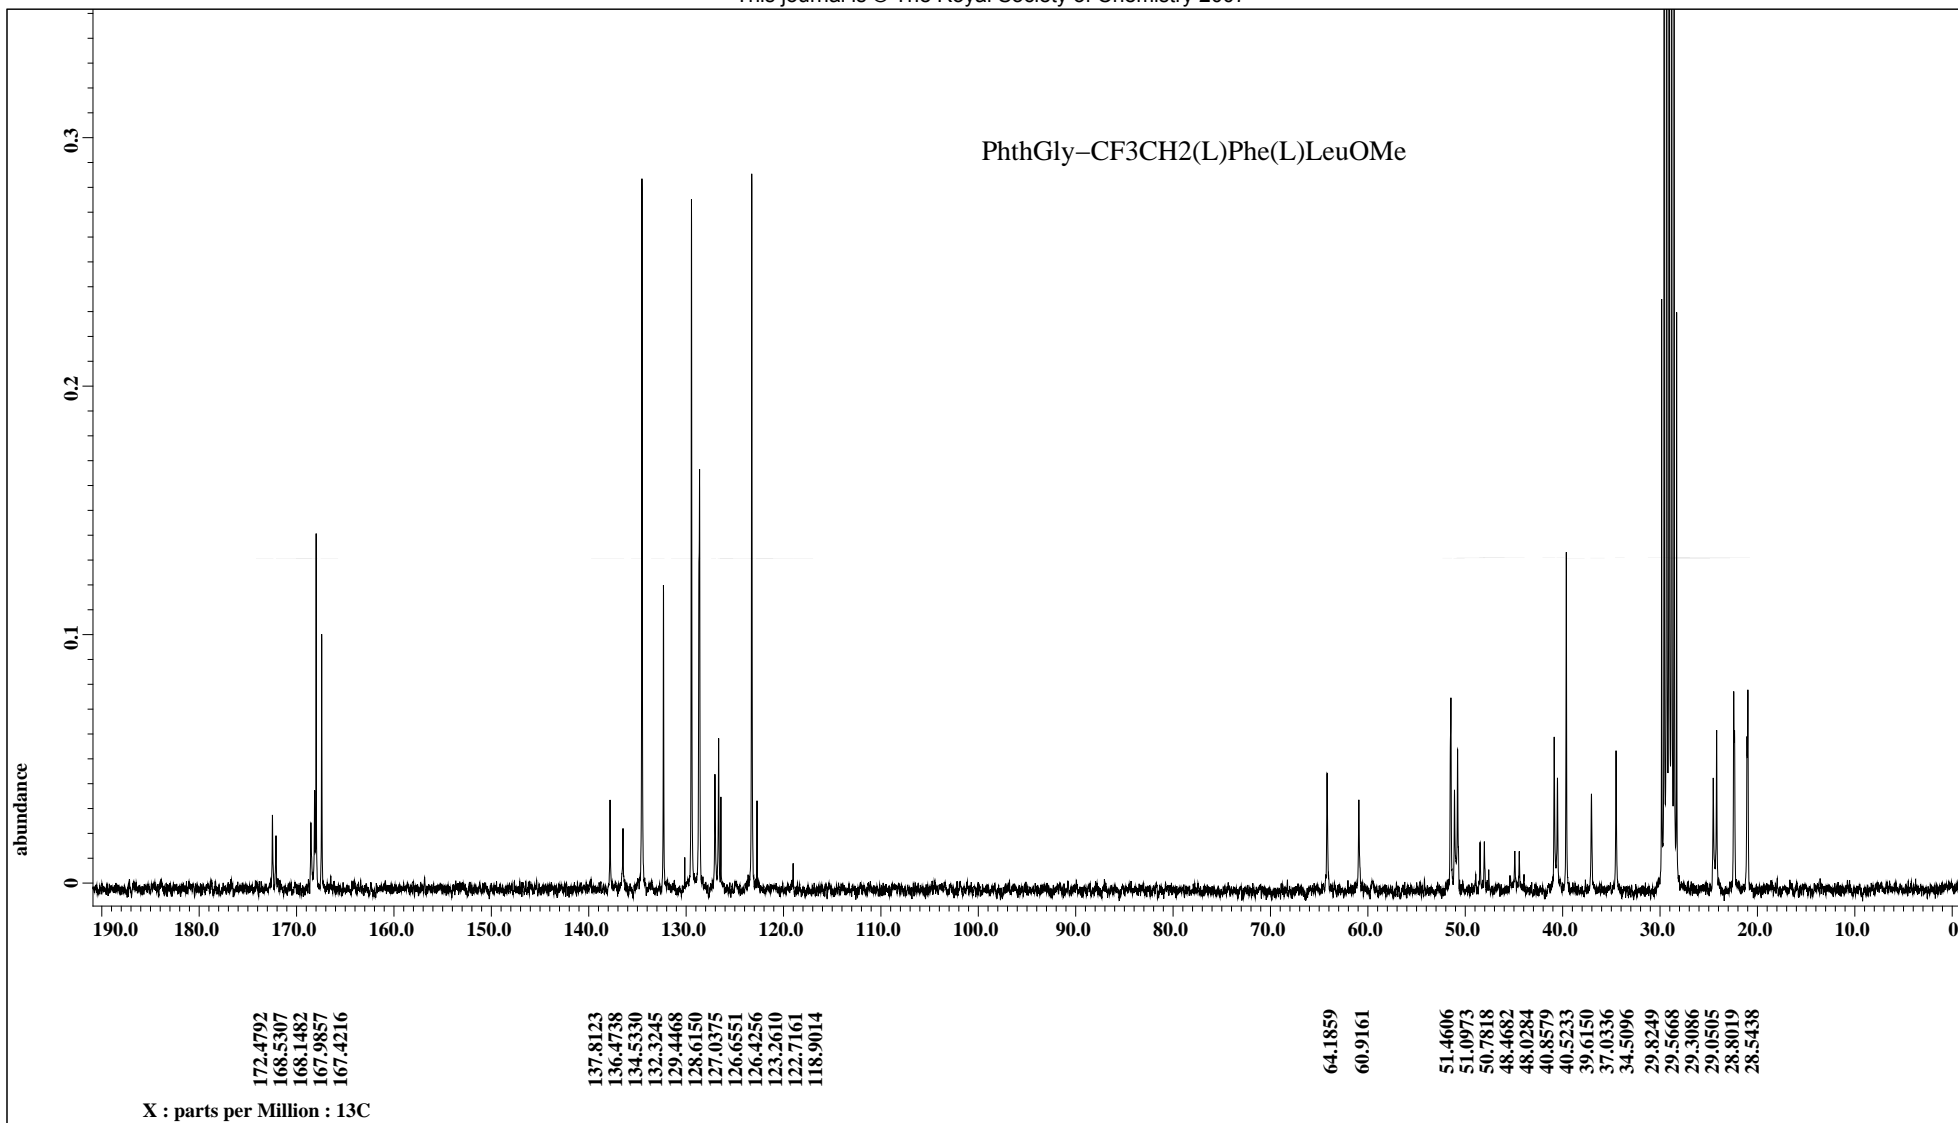

Filename = Lu\_PhthGly-CF<sub>3</sub>CH<sub>2</sub>(L)P  
 Author = Delta  
 Experiment = single\_pulse\_dec  
 Sample\_id = 1  
 Solvent = ACETONE-D<sub>6</sub>  
 Creation\_time = 19-JUL-2007 19:42:26  
 Revision\_time = 6-AUG-2007 17:09:08  
 Current\_time = 6-AUG-2007 17:09:50  
 Comment = single\_pulse decouple  
 Data\_format = 1D\_COMPLEX  
 Dim\_size = 26214  
 Dim\_title = 13C  
 Dim\_units = [ppm]  
 Dimensions = X  
 Site = ECX 300  
 Spectrometer = DELTA2\_NMR

Field\_strength = 7.0586013[T] (300[MHz]  
 X\_acq\_duration = 1.38412032[s]  
 X\_domain = 13C  
 X\_freq = 75.56823426[MHz]  
 X\_offset = 100[ppm]  
 X\_points = 32768  
 X\_prescans = 4  
 X\_resolution = 0.72248054[Hz]  
 X\_sweep = 23.67424242[kHz]  
 Irr\_domain = 1H  
 Irr\_freq = 300.52965592[MHz]  
 Irr\_offset = 5[ppm]  
 Clipped = TRUE  
 Mod\_return = 1  
 Scans = 2885  
 Total\_scans = 2885  
 X\_90\_width = 14.05[us]

X\_acq\_time = 1.38412032[s]  
 X\_angle = 30[deg]  
 X\_atn = 6[dB]  
 X\_pulse = 4.68333333[us]  
 Irr\_atn\_dec = 22[dB]  
 Irr\_atn\_noe = 22[dB]  
 Irr\_noise = WALTZ  
 Decoupling = TRUE  
 Initial\_wait = 1[s]  
 Noe = TRUE  
 Noe\_time = 2[s]  
 Recvr\_gain = 60  
 Relaxation\_delay = 2[s]  
 Repetition\_time = 3.38412032[s]  
 Temp\_get = 21.1[dC]

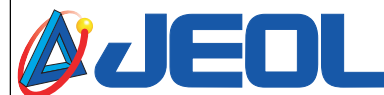

6. HRMS and NMR spectra of **4** (n = 0)

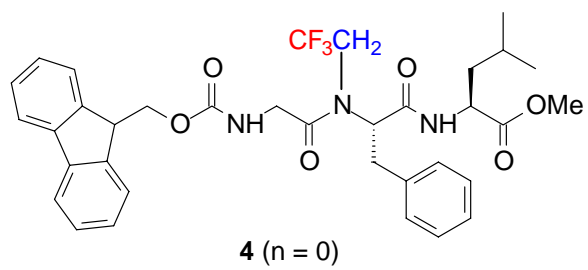



Single Mass Analysis

Tolerance = 10.0 PPM / DBE: min = -1.5, max = 100.0

Selected filters: None

Monoisotopic Mass, Even Electron Ions

113 formula(e) evaluated with 2 results within limits (all results (up to 1000) for each mass)

Elements Used:

C: 0-50 H: 0-80 N: 2-4 O: 5-7 F: 3-3 Na: 0-1

Changqing Lu, Lu\_02

Mass Spec Lab, SCS, University of Illinois

Qtof\_17791 41 (2.908) AM (Cen,3, 80.00, Ar,12000.0,716.46,0.70,LS 3); Sm (SG, 2x5.00)

Q-tof  
1: TOF MS ES+  
697

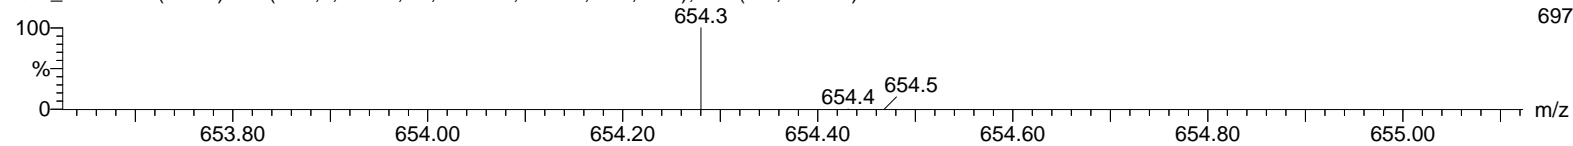

Minimum: -1.5  
Maximum: 5.0 10.0 100.0

| Mass     | Calc. Mass | mDa | PPM | DBE  | i-FIT     | Formula |     |    |    |    |    |
|----------|------------|-----|-----|------|-----------|---------|-----|----|----|----|----|
| 654.2803 | 654.2791   | 1.2 | 1.8 | 16.5 | 5546368.0 | C35     | H39 | N3 | O6 | F3 |    |
|          | 654.2767   | 3.6 | 5.5 | 13.5 | 5546367.5 | C33     | H40 | N3 | O6 | F3 | Na |

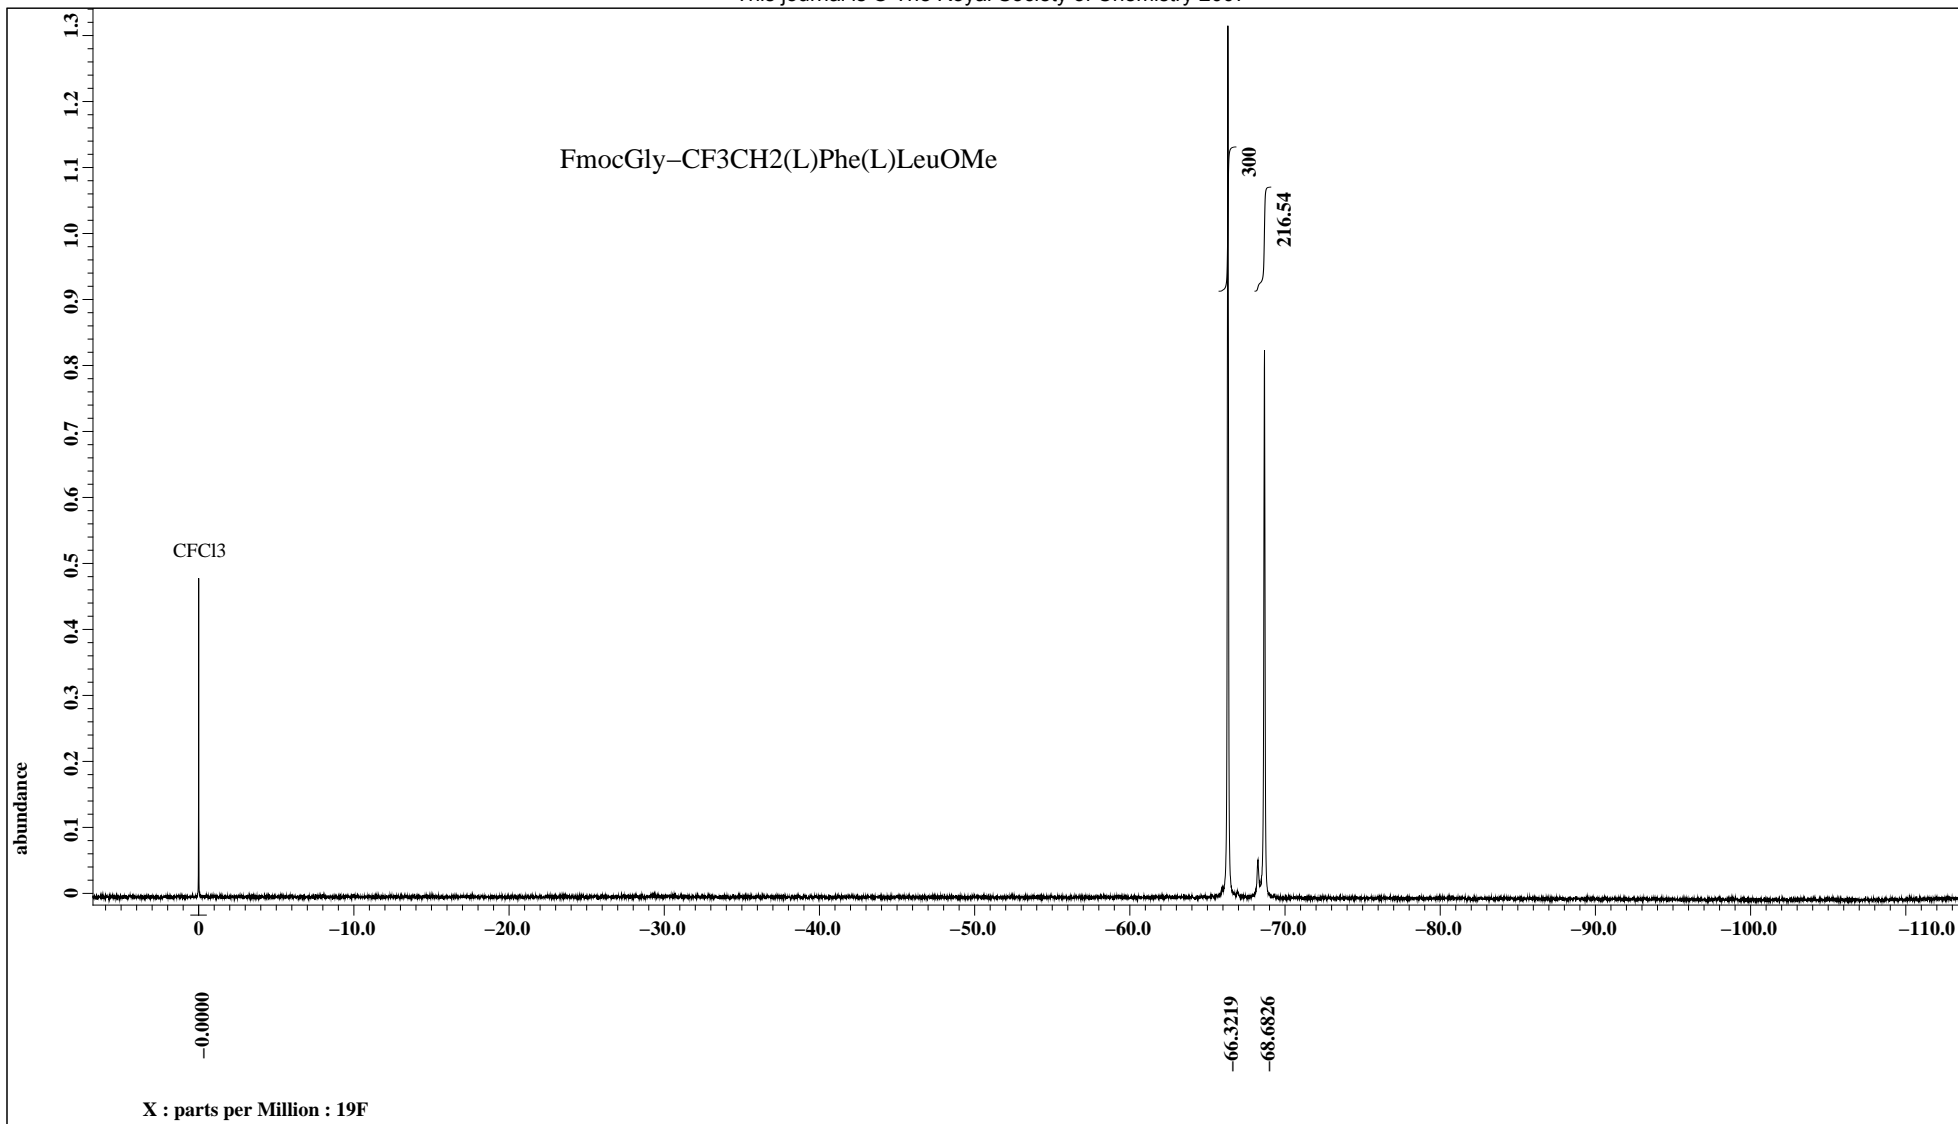

|               |                         |                |                          |                  |                 |
|---------------|-------------------------|----------------|--------------------------|------------------|-----------------|
| Filename      | = Lu_FmocGly-CF3CH2(L)P | Field_strength | = 7.0586013[T] (300[MHz] | Total_scans      | = 32            |
| Author        | = Delta                 | X_acq_duration | = 0.30408704[s]          | X_90_width       | = 12.2[us]      |
| Experiment    | = single_pulse.ex2      | X_domain       | = 19F                    | X_acq_time       | = 0.30408704[s] |
| Sample_id     | = 1                     | X_freq         | = 282.78036857[MHz]      | X_angle          | = 45[deg]       |
| Solvent       | = ACETONE-D6            | X_offset       | = -100[ppm]              | X_atn            | = 3[dB]         |
| Creation_time | = 15-JUN-2007 13:50:18  | X_points       | = 32768                  | X_pulse          | = 6.1[us]       |
| Revision_time | = 6-AUG-2007 17:20:19   | X_prescans     | = 1                      | Irr_mode         | = Off           |
| Current_time  | = 6-AUG-2007 17:24:09   | X_resolution   | = 3.28853213[Hz]         | Tri_mode         | = Off           |
| Comment       | = single_pulse          | X_sweep        | = 107.75862069[kHz]      | Dante_presat     | = FALSE         |
| Data_format   | = 1D_COMPLEX            | Irr_domain     | = 19F                    | Initial_wait     | = 1[s]          |
| Dim_size      | = 26214                 | Irr_freq       | = 282.78036857[MHz]      | Recvr_gain       | = 40            |
| Dim_title     | = 19F                   | Irr_offset     | = 5[ppm]                 | Relaxation_delay | = 2[s]          |
| Dim_units     | = [ppm]                 | Tri_domain     | = 19F                    | Repetition_time  | = 2.30408704[s] |
| Dimensions    | = X                     | Tri_freq       | = 282.78036857[MHz]      | Temp_get         | = 22[dC]        |
| Site          | = ECX 300               | Tri_offset     | = 5[ppm]                 |                  |                 |
| Spectrometer  | = DELTA2_NMR            | Clipped        | = FALSE                  |                  |                 |
|               |                         | Mod_return     | = 1                      |                  |                 |
|               |                         | Scans          | = 32                     |                  |                 |



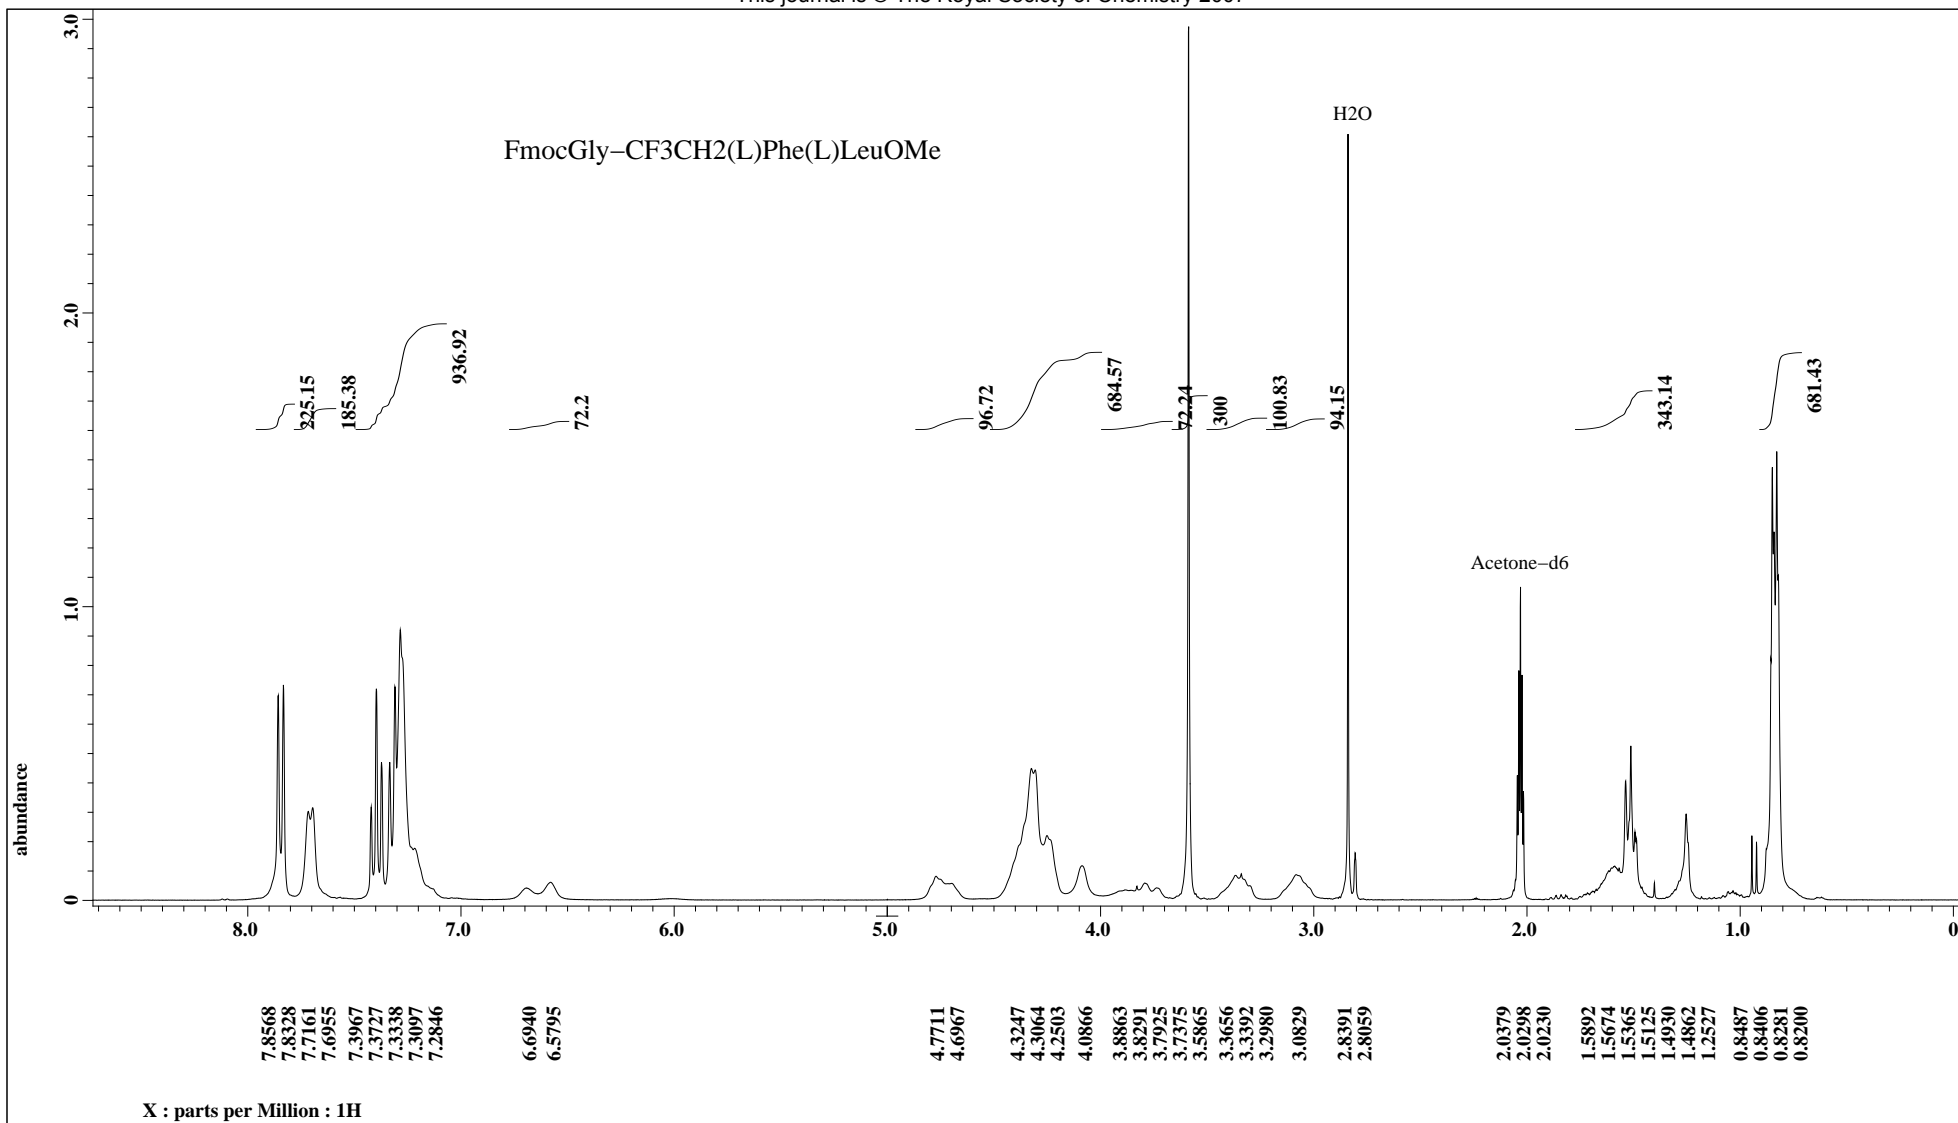

|               |                         |                |                          |                  |                 |
|---------------|-------------------------|----------------|--------------------------|------------------|-----------------|
| Filename      | = Lu_FmocGlyCF3CH2(L)Ph | Field_strength | = 7.0586013[T] (300[MHz] | Total_scans      | = 32            |
| Author        | = Delta                 | X_acq_duration | = 2.90717696[s]          | X_90_width       | = 13.3[us]      |
| Experiment    | = single_pulse.ex2      | X_domain       | = 1H                     | X_acq_time       | = 2.90717696[s] |
| Sample_id     | = 1                     | X_freq         | = 300.52965592[MHz]      | X_angle          | = 45[deg]       |
| Solvent       | = ACETONE-D6            | X_offset       | = 5[ppm]                 | X_atn            | = 3[dB]         |
| Creation_time | = 15-JUN-2007 13:56:58  | X_points       | = 16384                  | X_pulse          | = 6.65[us]      |
| Revision_time | = 6-AUG-2007 17:29:09   | X_prescans     | = 1                      | Irr_mode         | = Off           |
| Current_time  | = 6-AUG-2007 17:29:46   | X_resolution   | = 0.34397631[Hz]         | Tri_mode         | = Off           |
| Comment       | = single_pulse          | X_sweep        | = 5.63570784[kHz]        | Dante_presat     | = FALSE         |
| Data_format   | = 1D_COMPLEX            | Irr_domain     | = 1H                     | Initial_wait     | = 1[s]          |
| Dim_size      | = 13107                 | Irr_freq       | = 300.52965592[MHz]      | Recvr_gain       | = 40            |
| Dim_title     | = 1H                    | Irr_offset     | = 5[ppm]                 | Relaxation_delay | = 2[s]          |
| Dim_units     | = [ppm]                 | Tri_domain     | = 1H                     | Repetition_time  | = 4.90717696[s] |
| Dimensions    | = X                     | Tri_freq       | = 300.52965592[MHz]      | Temp_get         | = 21.9[dC]      |
| Site          | = ECX 300               | Tri_offset     | = 5[ppm]                 |                  |                 |
| Spectrometer  | = DELTA2_NMR            | Clipped        | = FALSE                  |                  |                 |
|               |                         | Mod_return     | = 1                      |                  |                 |
|               |                         | Scans          | = 32                     |                  |                 |

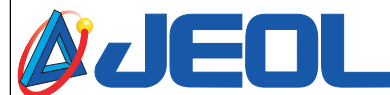

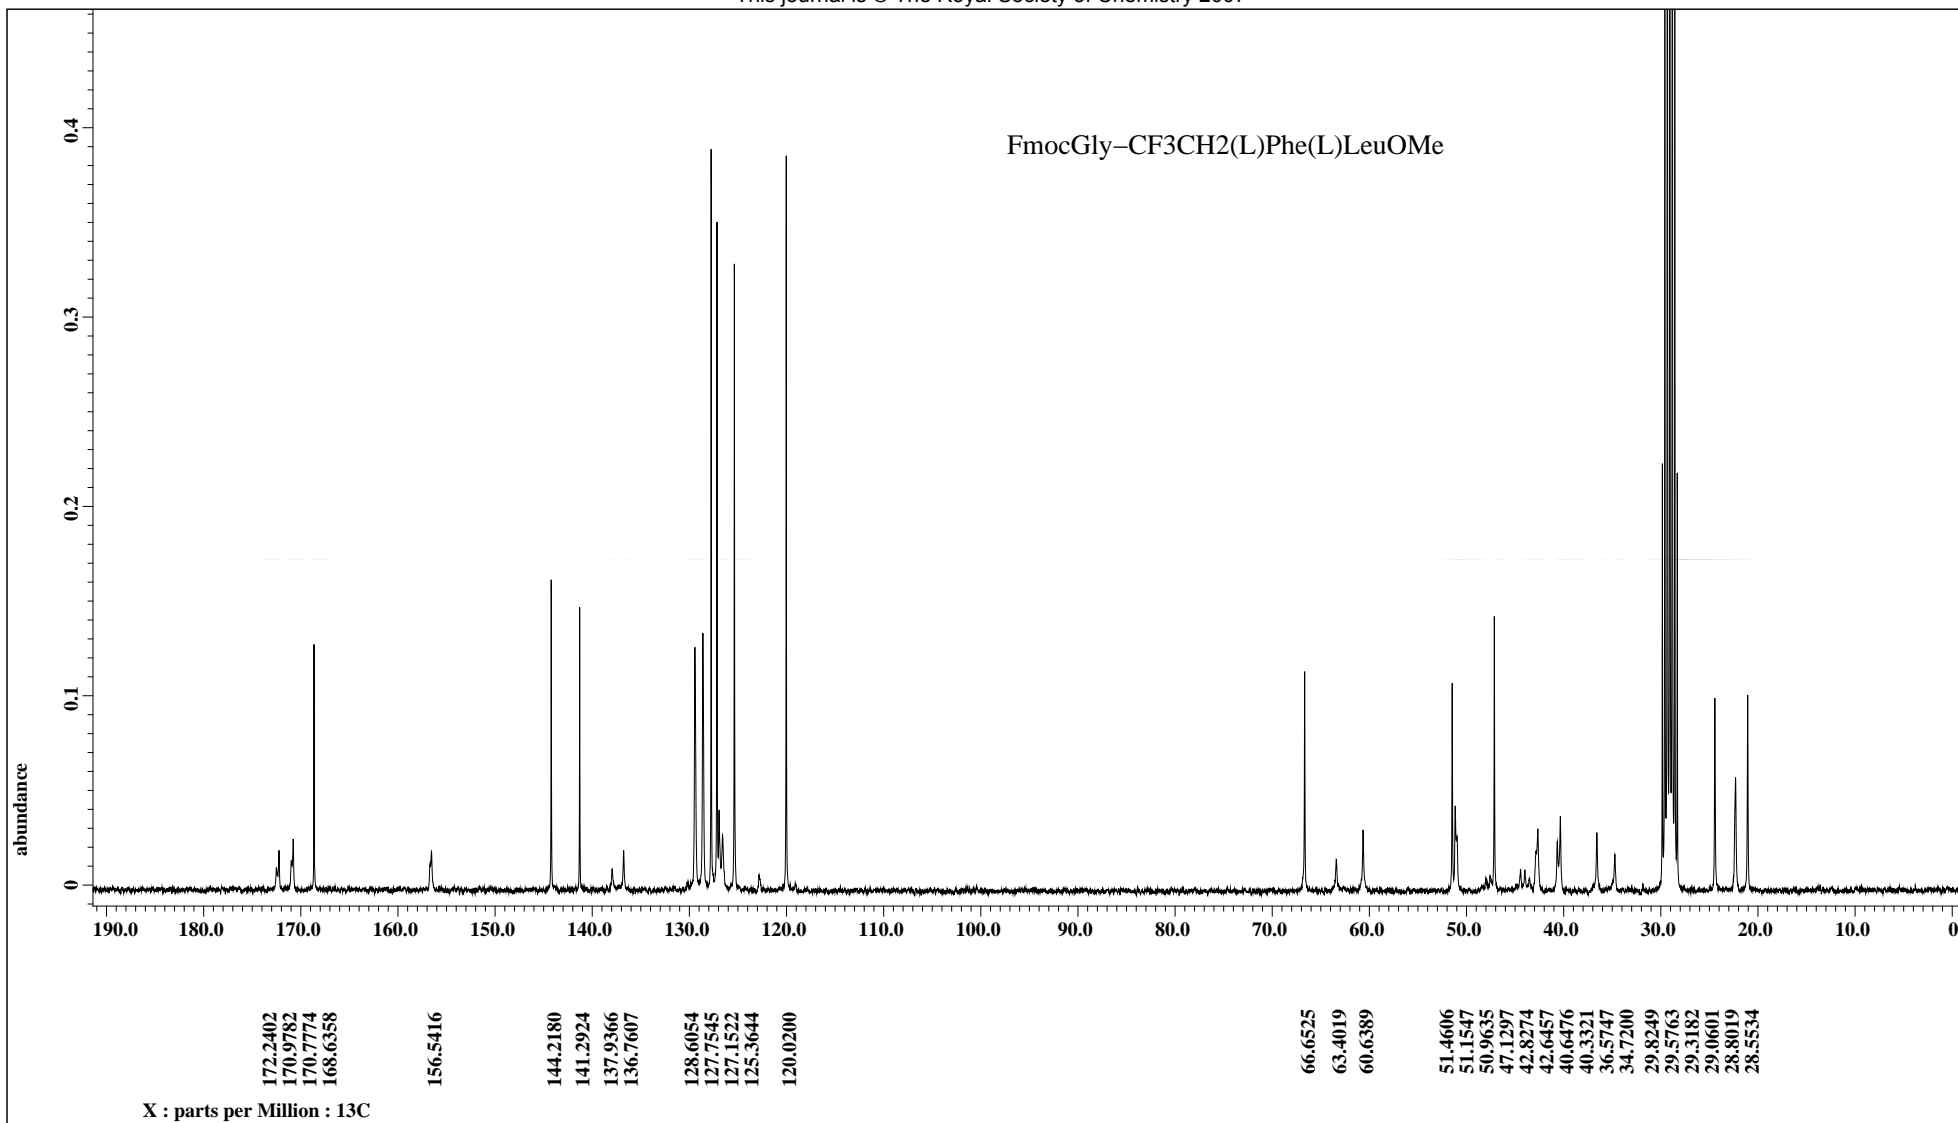

172.2402  
170.9782  
170.7774  
168.6358  
  
156.5416  
  
144.2180  
141.2924  
137.9366  
136.7607  
  
128.6054  
127.7545  
127.1522  
125.3644  
120.0200  
  
66.6525  
63.4019  
60.6389  
  
51.4606  
51.1547  
50.9635  
47.1297  
42.8274  
42.6457  
40.6476  
40.3321  
36.5747  
34.7200  
29.8249  
29.5763  
29.3182  
29.0601  
28.8019  
28.5534

|               |                         |                |                          |                  |                  |
|---------------|-------------------------|----------------|--------------------------|------------------|------------------|
| Filename      | = Lu_FmocGly-CF3CH2(L)P | Field strength | = 7.0586013[T] (300[MHz] | X_acq_time       | = 1.38412032[s]  |
| Author        | = Delta                 | X_acq_duration | = 1.38412032[s]          | X_angle          | = 30[deg]        |
| Experiment    | = single_pulse_dec      | X_domain       | = 13C                    | X_atn            | = 6[dB]          |
| Sample_id     | = 1                     | X_freq         | = 75.56823426[MHz]       | X_pulse          | = 4.68333333[us] |
| Solvent       | = ACETONE-D6            | X_offset       | = 100[ppm]               | Irr_atn_dec      | = 22[dB]         |
| Creation_time | = 20-JUL-2007 05:18:10  | X_points       | = 32768                  | Irr_atn_noe      | = 22[dB]         |
| Revision_time | = 6-AUG-2007 17:38:18   | X_prescans     | = 4                      | Irr_noise        | = WALTZ          |
| Current_time  | = 6-AUG-2007 17:40:26   | X_resolution   | = 0.72248054[Hz]         | Decoupling       | = TRUE           |
| Comment       | = single pulse decouple | X_sweep        | = 23.67424242[kHz]       | Initial_wait     | = 1[s]           |
| Data_format   | = 1D COMPLEX            | Irr_domain     | = 1H                     | Noe              | = TRUE           |
| Dim_size      | = 26214                 | Irr_freq       | = 300.52965592[MHz]      | Noe_time         | = 2[s]           |
| Dim_title     | = 13C                   | Irr_offset     | = 5[ppm]                 | Recvr_gain       | = 60             |
| Dim_units     | = [ppm]                 | Clipped        | = TRUE                   | Relaxation_delay | = 2[s]           |
| Dimensions    | = X                     | Mod_return     | = 1                      | Repetition_time  | = 3.38412032[s]  |
| Site          | = ECX 300               | Scans          | = 10000                  | Temp_get         | = 21.9[dC]       |
| Spectrometer  | = DELTA2_NMR            | Total_scans    | = 10000                  |                  |                  |
|               |                         | X_90_width     | = 14.05[us]              |                  |                  |



7. HRMS and NMR spectra of **4** (n = 1)

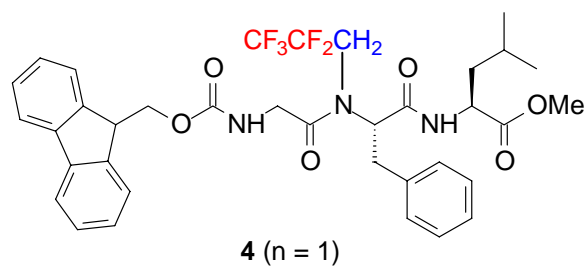

Single Mass Analysis

Tolerance = 10.0 PPM / DBE: min = -1.5, max = 100.0

Selected filters: None

Monoisotopic Mass, Even Electron Ions

113 formula(e) evaluated with 2 results within limits (all results (up to 1000) for each mass)

Elements Used:

C: 0-50 H: 0-80 N: 2-4 O: 5-7 F: 5-5 Na: 0-1

Changqing Lu, Lu\_03

Mass Spec Lab, SCS, University of Illinois

Qtof\_17792 43 (3.080) AM (Cen,3, 80.00, Ar,12000.0,716.46,0.70,LS 3); Sm (SG, 2x5.00)

Q-tof  
1: TOF MS ES+  
1.16e3

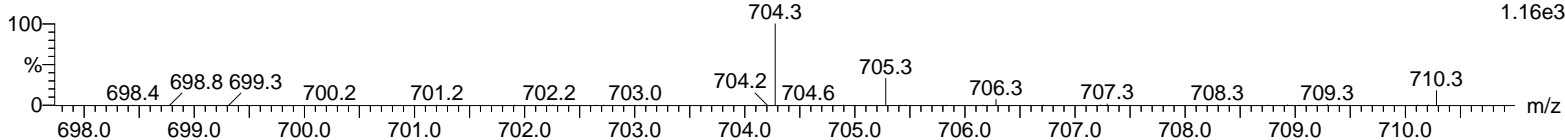

Minimum: -1.5  
Maximum: 5.0 10.0 100.0

| Mass     | Calc. Mass | mDa  | PPM  | DBE  | i-FIT | Formula             |
|----------|------------|------|------|------|-------|---------------------|
| 704.2755 | 704.2759   | -0.4 | -0.6 | 16.5 | 13.3  | C36 H39 N3 O6 F5    |
|          | 704.2735   | 2.0  | 2.8  | 13.5 | 7.6   | C34 H40 N3 O6 F5 Na |

FmocGly-CF<sub>3</sub>CF<sub>2</sub>CH<sub>2</sub>(L)Phe(L)LeuOMe

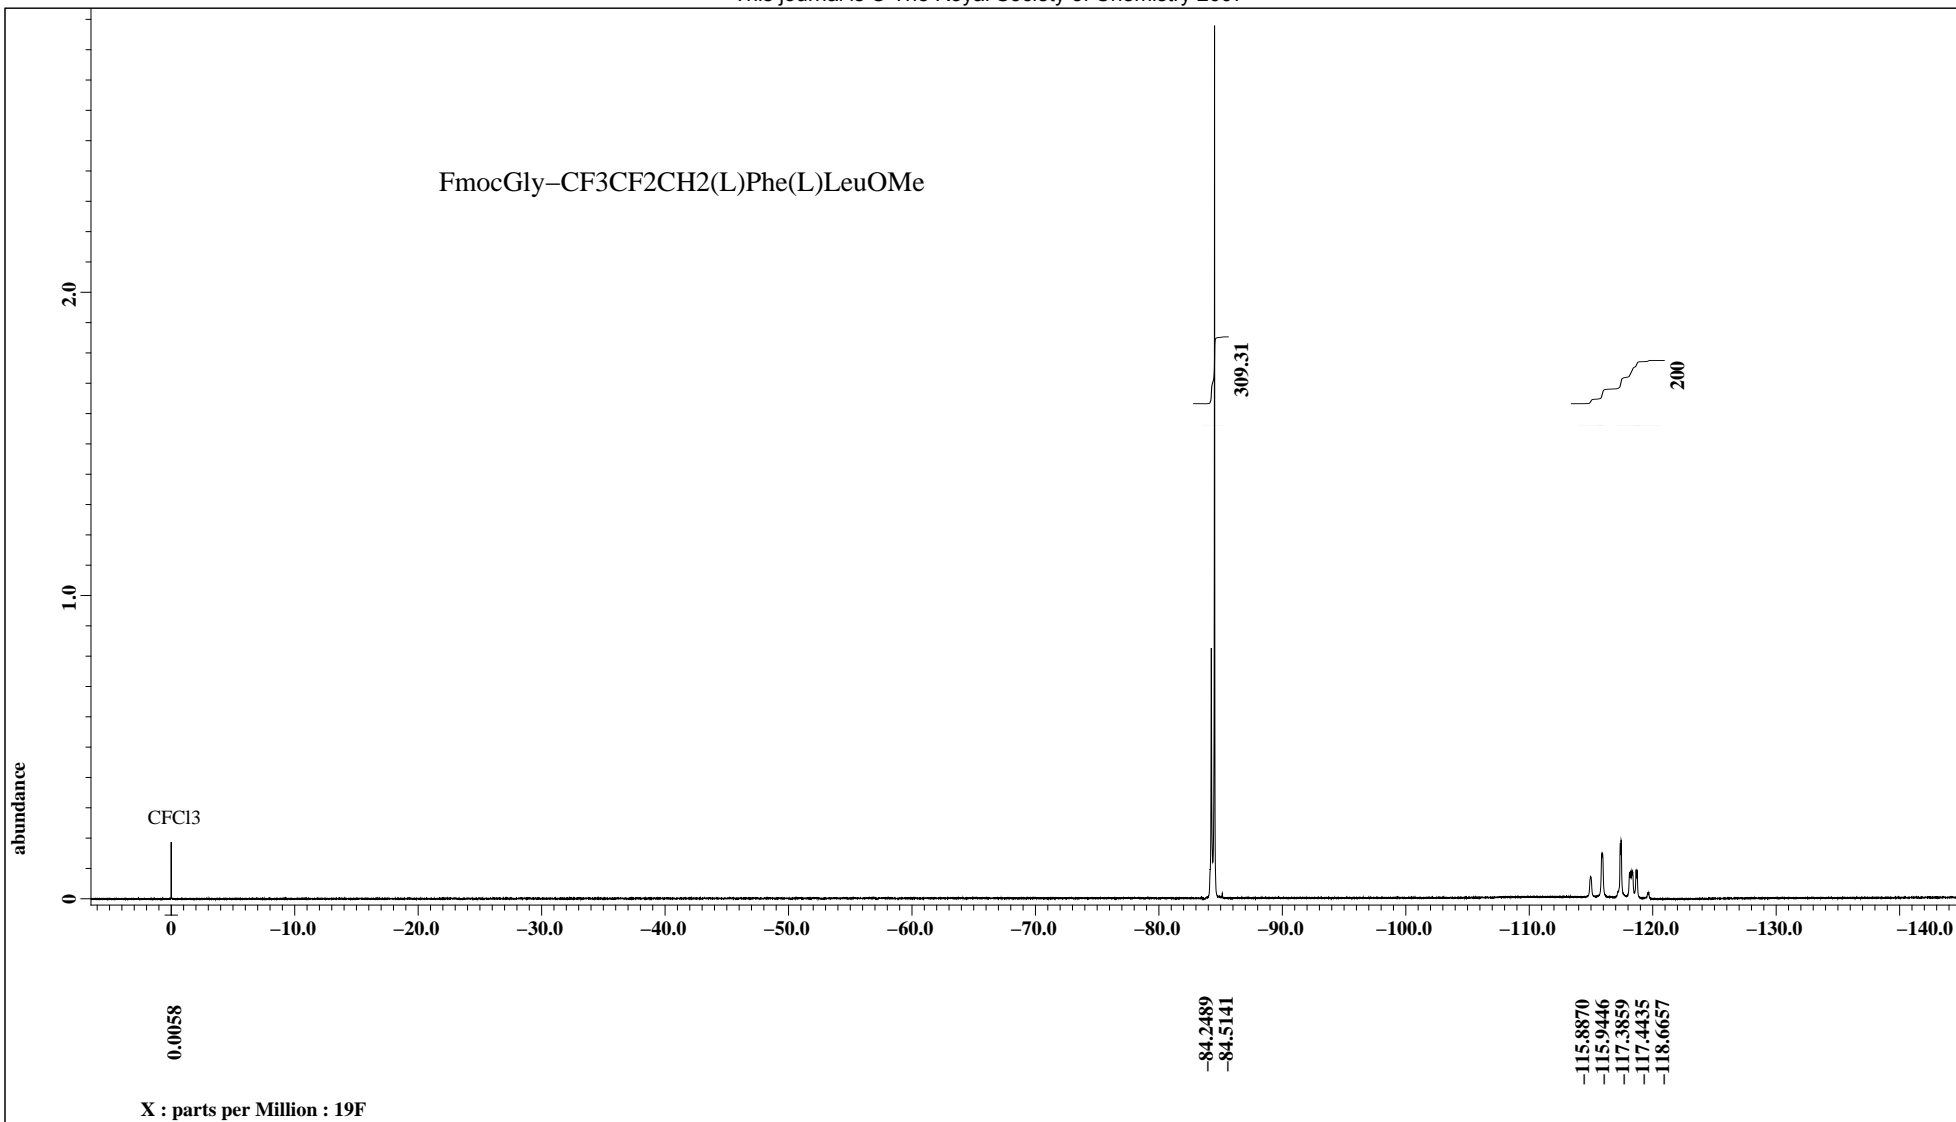

|               |                                                                |                |                          |                  |                 |
|---------------|----------------------------------------------------------------|----------------|--------------------------|------------------|-----------------|
| Filename      | = Lu_FmocGly-CF <sub>3</sub> CF <sub>2</sub> CH <sub>2</sub> ( | Field_strength | = 7.0586013[T] (300[MHz] | Total_scans      | = 32            |
| Author        | = Delta                                                        | X_acq_duration | = 0.61341696[s]          | X_90_width       | = 12.2[us]      |
| Experiment    | = single_pulse.ex2                                             | X_domain       | = 19F                    | X_acq_time       | = 0.61341696[s] |
| Sample_id     | = 1                                                            | X_freq         | = 282.78036857[MHz]      | X_angle          | = 45[deg]       |
| Solvent       | = ACETONE-D <sub>6</sub>                                       | X_offset       | = -70[ppm]               | X_atn            | = 3[dB]         |
| Creation_time | = 3-JUL-2007 12:56:49                                          | X_points       | = 32768                  | X_pulse          | = 6.1[us]       |
| Revision_time | = 6-AUG-2007 16:42:51                                          | X_prescans     | = 1                      | Irr_mode         | = Off           |
| Current_time  | = 6-AUG-2007 16:43:22                                          | X_resolution   | = 1.63021251[Hz]         | Tri_mode         | = Off           |
| Comment       | = single_pulse                                                 | X_sweep        | = 53.41880342[kHz]       | Dante_presat     | = FALSE         |
| Data_format   | = 1D_COMPLEX                                                   | Irr_domain     | = 19F                    | Initial_wait     | = 1[s]          |
| Dim_size      | = 26214                                                        | Irr_freq       | = 282.78036857[MHz]      | Recvr_gain       | = 38            |
| Dim_title     | = 19F                                                          | Irr_offset     | = 5[ppm]                 | Relaxation_delay | = 2[s]          |
| Dim_units     | = [ppm]                                                        | Tri_domain     | = 19F                    | Repetition_time  | = 2.61341696[s] |
| Dimensions    | = X                                                            | Tri_freq       | = 282.78036857[MHz]      | Temp_get         | = 21.9[dC]      |
| Site          | = ECX 300                                                      | Tri_offset     | = 5[ppm]                 |                  |                 |
| Spectrometer  | = DELTA2_NMR                                                   | Clipped        | = FALSE                  |                  |                 |
|               |                                                                | Mod_return     | = 1                      |                  |                 |
|               |                                                                | Scans          | = 32                     |                  |                 |



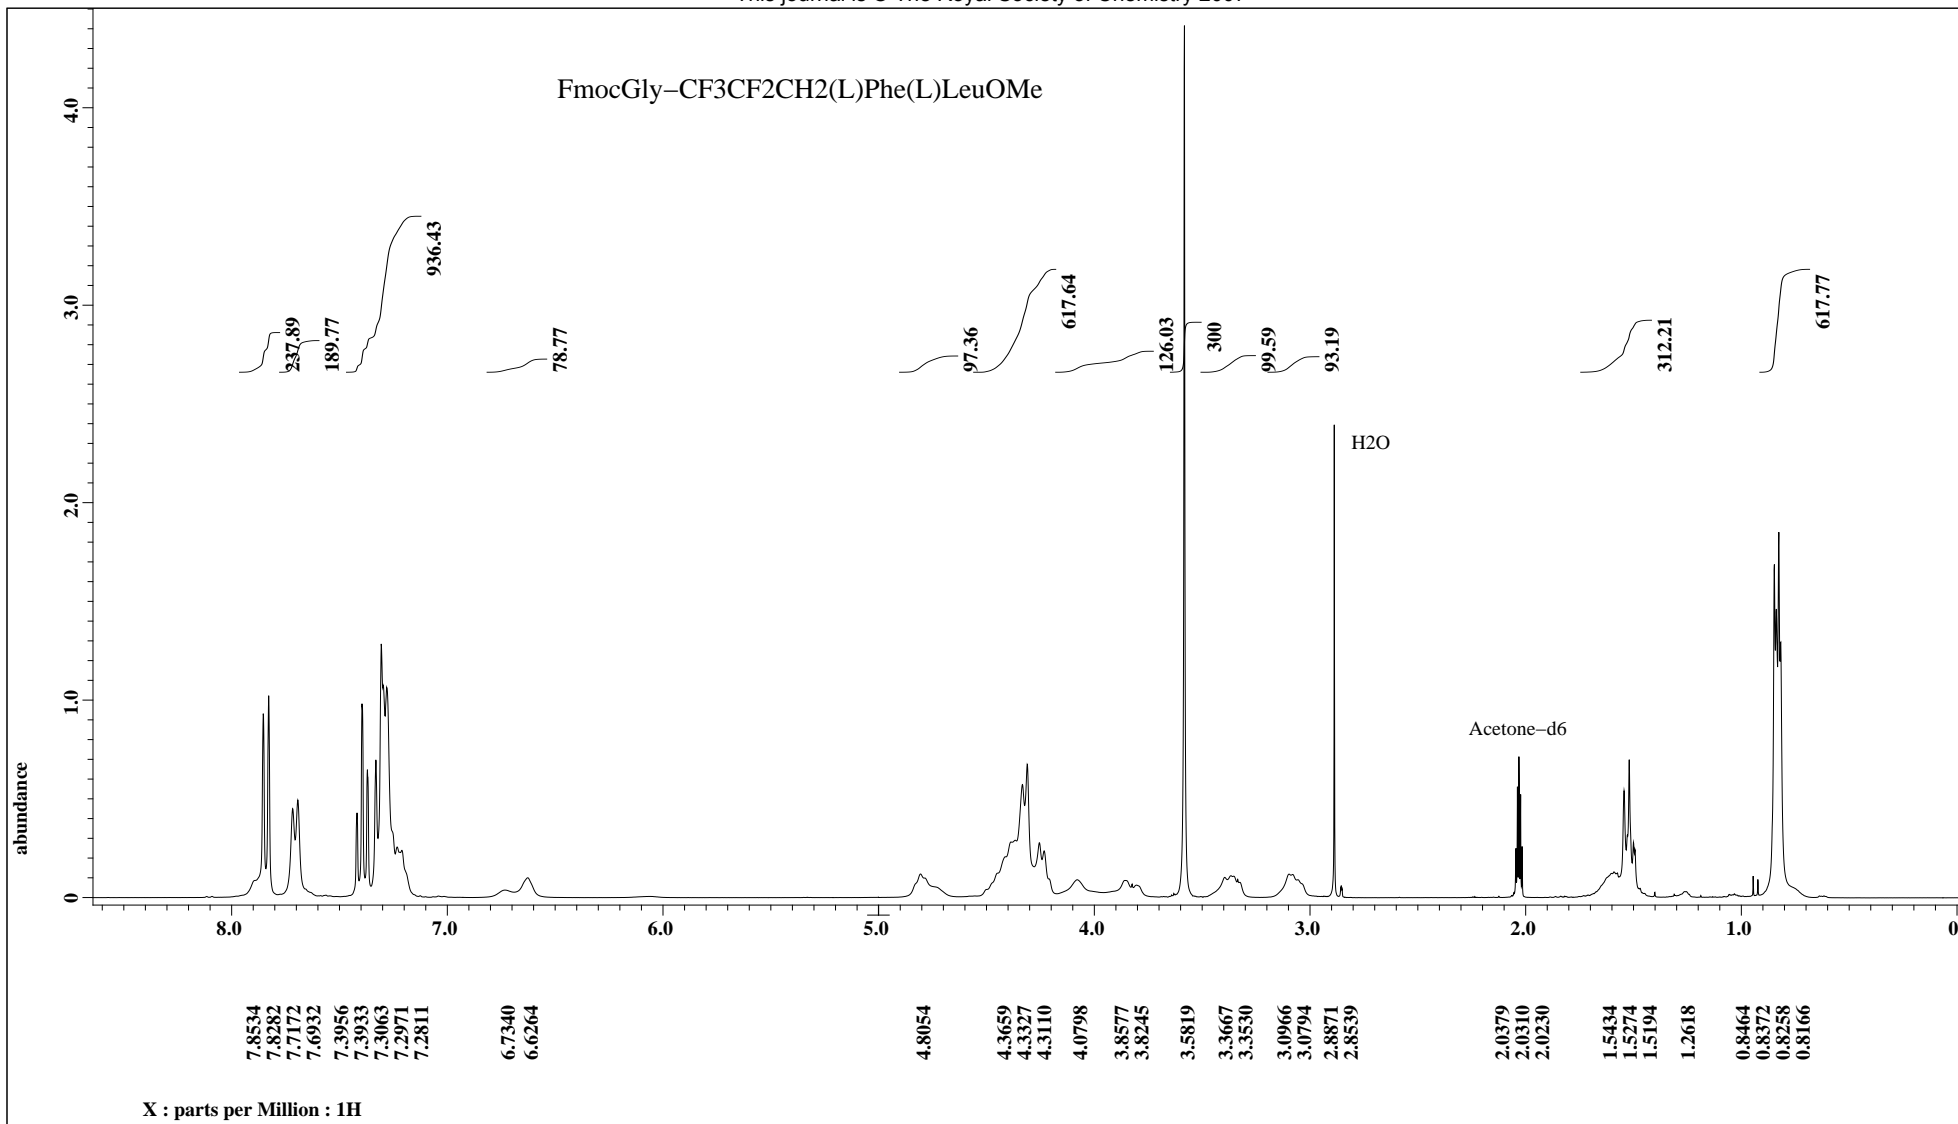

Filename = Lu\_FmocGly-CF<sub>3</sub>CF<sub>2</sub>CH<sub>2</sub>(  
 Author = Delta  
 Experiment = single\_pulse.ex2  
 Sample\_id = 1  
 Solvent = ACETONE-D6  
 Creation\_time = 3-JUL-2007 13:01:20  
 Revision\_time = 6-AUG-2007 16:37:40  
 Current\_time = 6-AUG-2007 16:38:15  
 Comment = single\_pulse  
 Data\_format = 1D\_COMPLEX  
 Dim\_size = 13107  
 Dim\_title = 1H  
 Dim\_units = [ppm]  
 Dimensions = X  
 Site = ECX 300  
 Spectrometer = DELTA2\_NMR

Field\_strength = 7.0586013[T] (300[MHz]  
 X\_acq\_duration = 2.90717696[s]  
 X\_domain = 1H  
 X\_freq = 300.52965592[MHz]  
 X\_offset = 5[ppm]  
 X\_points = 16384  
 X\_prescans = 1  
 X\_resolution = 0.34397631[Hz]  
 X\_sweep = 5.63570784[kHz]  
 Irr\_domain = 1H  
 Irr\_freq = 300.52965592[MHz]  
 Irr\_offset = 5[ppm]  
 Tri\_domain = 1H  
 Tri\_freq = 300.52965592[MHz]  
 Tri\_offset = 5[ppm]  
 Clipped = FALSE  
 Mod\_return = 1  
 Scans = 32

Total\_scans = 32  
 X\_90\_width = 13.3[us]  
 X\_acq\_time = 2.90717696[s]  
 X\_angle = 45[deg]  
 X\_atn = 3[dB]  
 X\_pulse = 6.65[us]  
 Irr\_mode = Off  
 Tri\_mode = Off  
 Dante\_presat = FALSE  
 Initial\_wait = 1[s]  
 Recvr\_gain = 34  
 Relaxation\_delay = 2[s]  
 Repetition\_time = 4.90717696[s]  
 Temp\_get = 21.9[dC]





FmocGly-CF<sub>3</sub>CF<sub>2</sub>CH<sub>2</sub>(L)Phe(L)LeuOMe

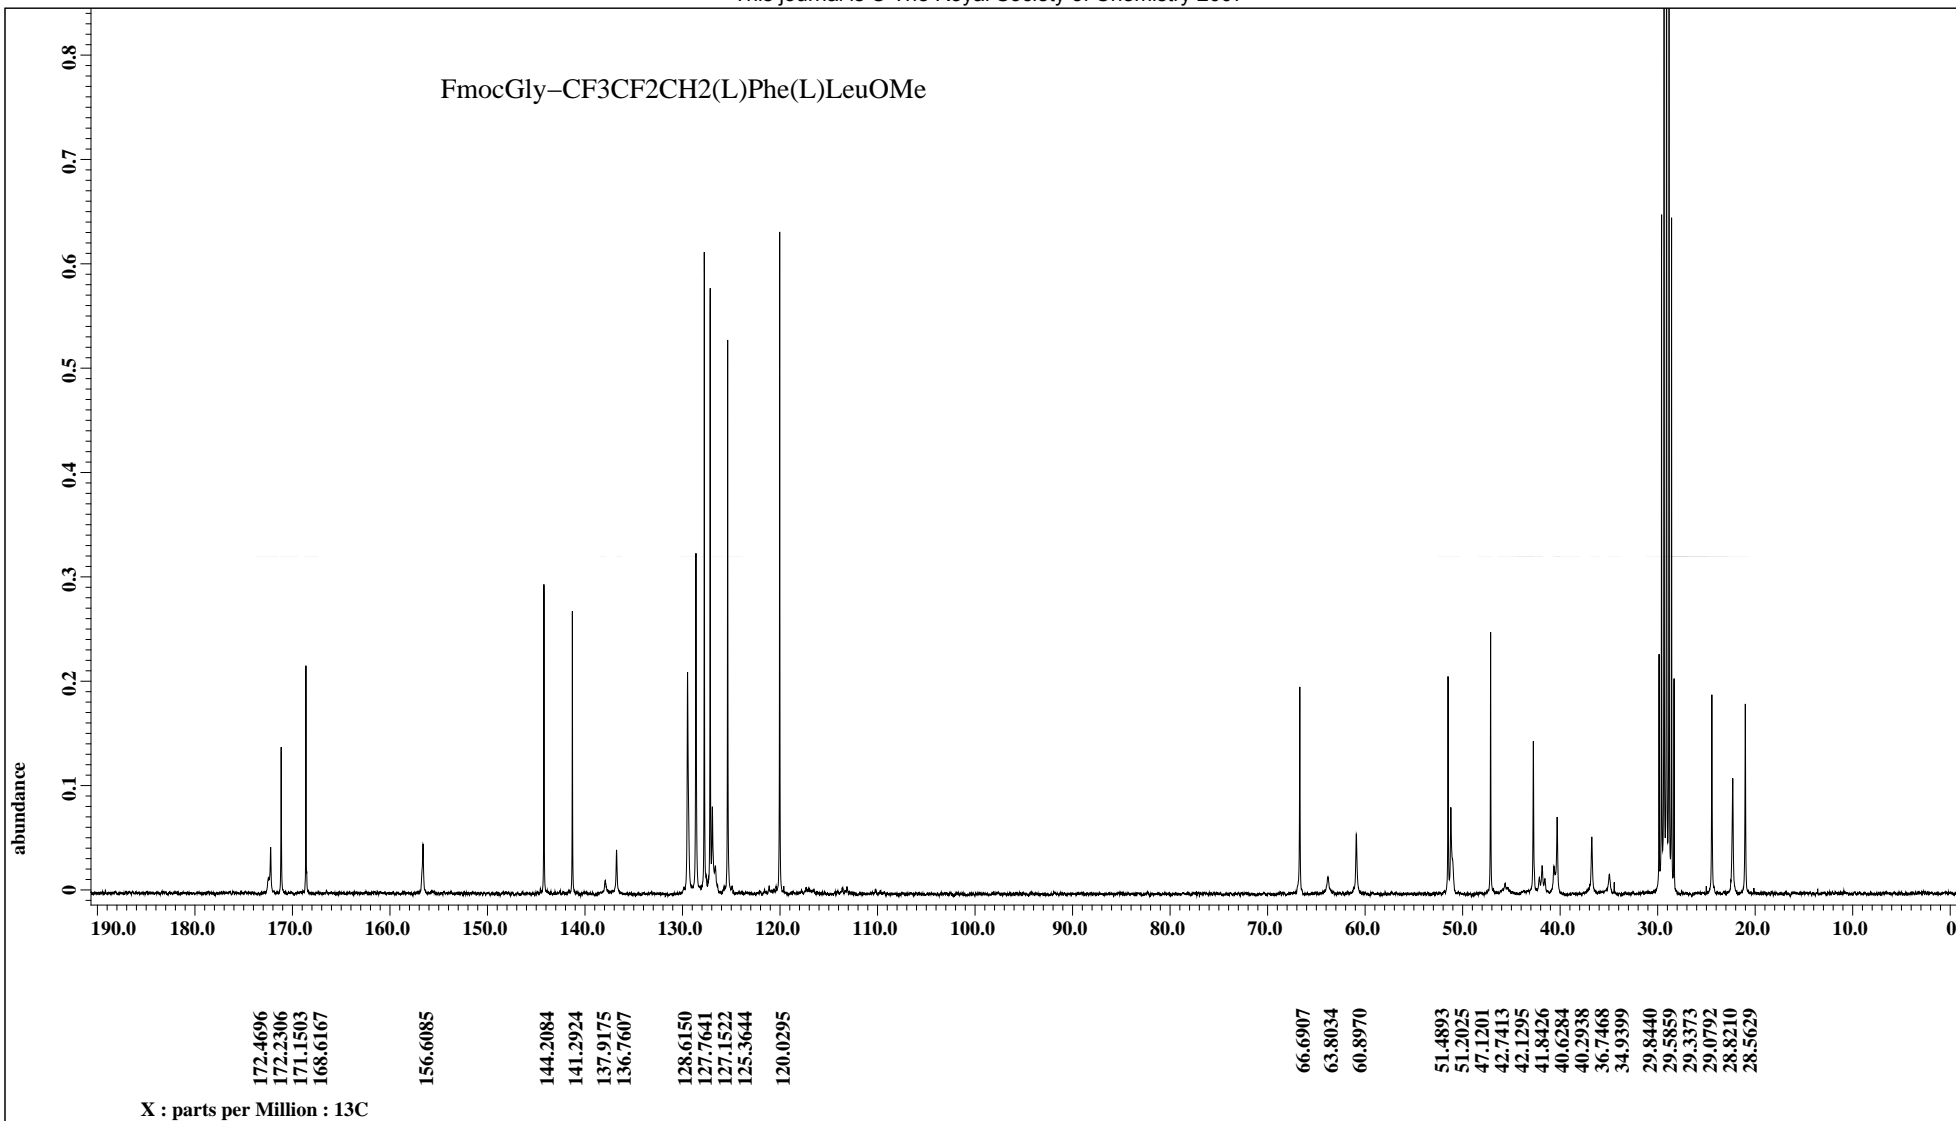

|               |                         |                |                          |                  |                  |
|---------------|-------------------------|----------------|--------------------------|------------------|------------------|
| Filename      | = Lu_FmocGly-CF3CF2CH2( | Field strength | = 7.0586013[T] (300[MHz] | X_acq_time       | = 1.38412032[s]  |
| Author        | = Delta                 | X_acq_duration | = 1.38412032[s]          | X_angle          | = 30[deg]        |
| Experiment    | = single_pulse_dec      | X_domain       | = 13C                    | X_atn            | = 6[dB]          |
| Sample_id     | = 1                     | X_freq         | = 75.56823426[MHz]       | X_pulse          | = 4.68333333[us] |
| Solvent       | = ACETONE-D6            | X_offset       | = 100[ppm]               | Irr_atn_dec      | = 22[dB]         |
| Creation_time | = 9-JUL-2007 08:58:23   | X_points       | = 32768                  | Irr_atn_noe      | = 22[dB]         |
| Revision_time | = 6-AUG-2007 16:47:36   | X_prescans     | = 4                      | Irr_noise        | = WALTZ          |
| Current_time  | = 6-AUG-2007 16:48:11   | X_resolution   | = 0.72248054[Hz]         | Decoupling       | = TRUE           |
| Comment       | = single_pulse decouple | X_sweep        | = 23.67424242[kHz]       | Initial_wait     | = 1[s]           |
| Data_format   | = 1D_COMPLEX            | Irr_domain     | = 1H                     | Noe              | = TRUE           |
| Dim_size      | = 26214                 | Irr_freq       | = 300.52965592[MHz]      | Noe_time         | = 2[s]           |
| Dim_title     | = 13C                   | Irr_offset     | = 5[ppm]                 | Recvr_gain       | = 60             |
| Dim_units     | = [ppm]                 | Clipped        | = TRUE                   | Relaxation_delay | = 2[s]           |
| Dimensions    | = X                     | Mod_return     | = 1                      | Repetition_time  | = 3.38412032[s]  |
| Site          | = ECX 300               | Scans          | = 8708                   | Temp_get         | = 21.7[dc]       |
| Spectrometer  | = DELTA2_NMR            | Total_scans    | = 8708                   |                  |                  |
|               |                         | x_90_width     | = 14.05[us]              |                  |                  |



8. HRMS and NMR spectra of **4** (n = 2)

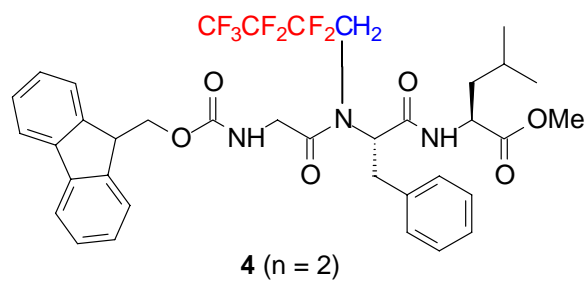

## Single Mass Analysis

Tolerance = 10.0 PPM / DBE: min = -1.5, max = 100.0

Selected filters: None

Monoisotopic Mass, Even Electron Ions

113 formula(e) evaluated with 2 results within limits (all results (up to 1000) for each mass)

Elements Used:

C: 0-50 H: 0-80 N: 2-4 O: 5-7 F: 7-7 Na: 0-1

Changqing Lu, Lu\_04

Mass Spec Lab, SCS, University of Illinois

Qtof\_17793 51 (3.649) AM (Cen,3, 80.00, Ar,12000.0,716.46,0.70,LS 3); Sm (SG, 2x5.00)

Q-tof  
1: TOF MS ES+  
694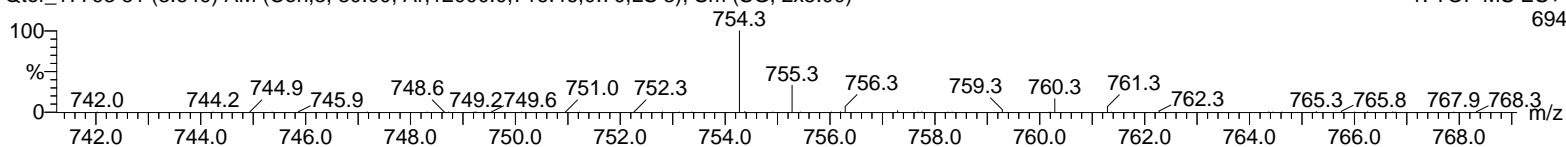

Minimum: -1.5  
Maximum: 5.0 10.0 100.0

| Mass     | Calc. Mass | mDa  | PPM  | DBE  | i-FIT | Formula             |
|----------|------------|------|------|------|-------|---------------------|
| 754.2725 | 754.2727   | -0.2 | -0.3 | 16.5 | 9.9   | C37 H39 N3 O6 F7    |
|          | 754.2703   | 2.2  | 2.9  | 13.5 | 6.1   | C35 H40 N3 O6 F7 Na |

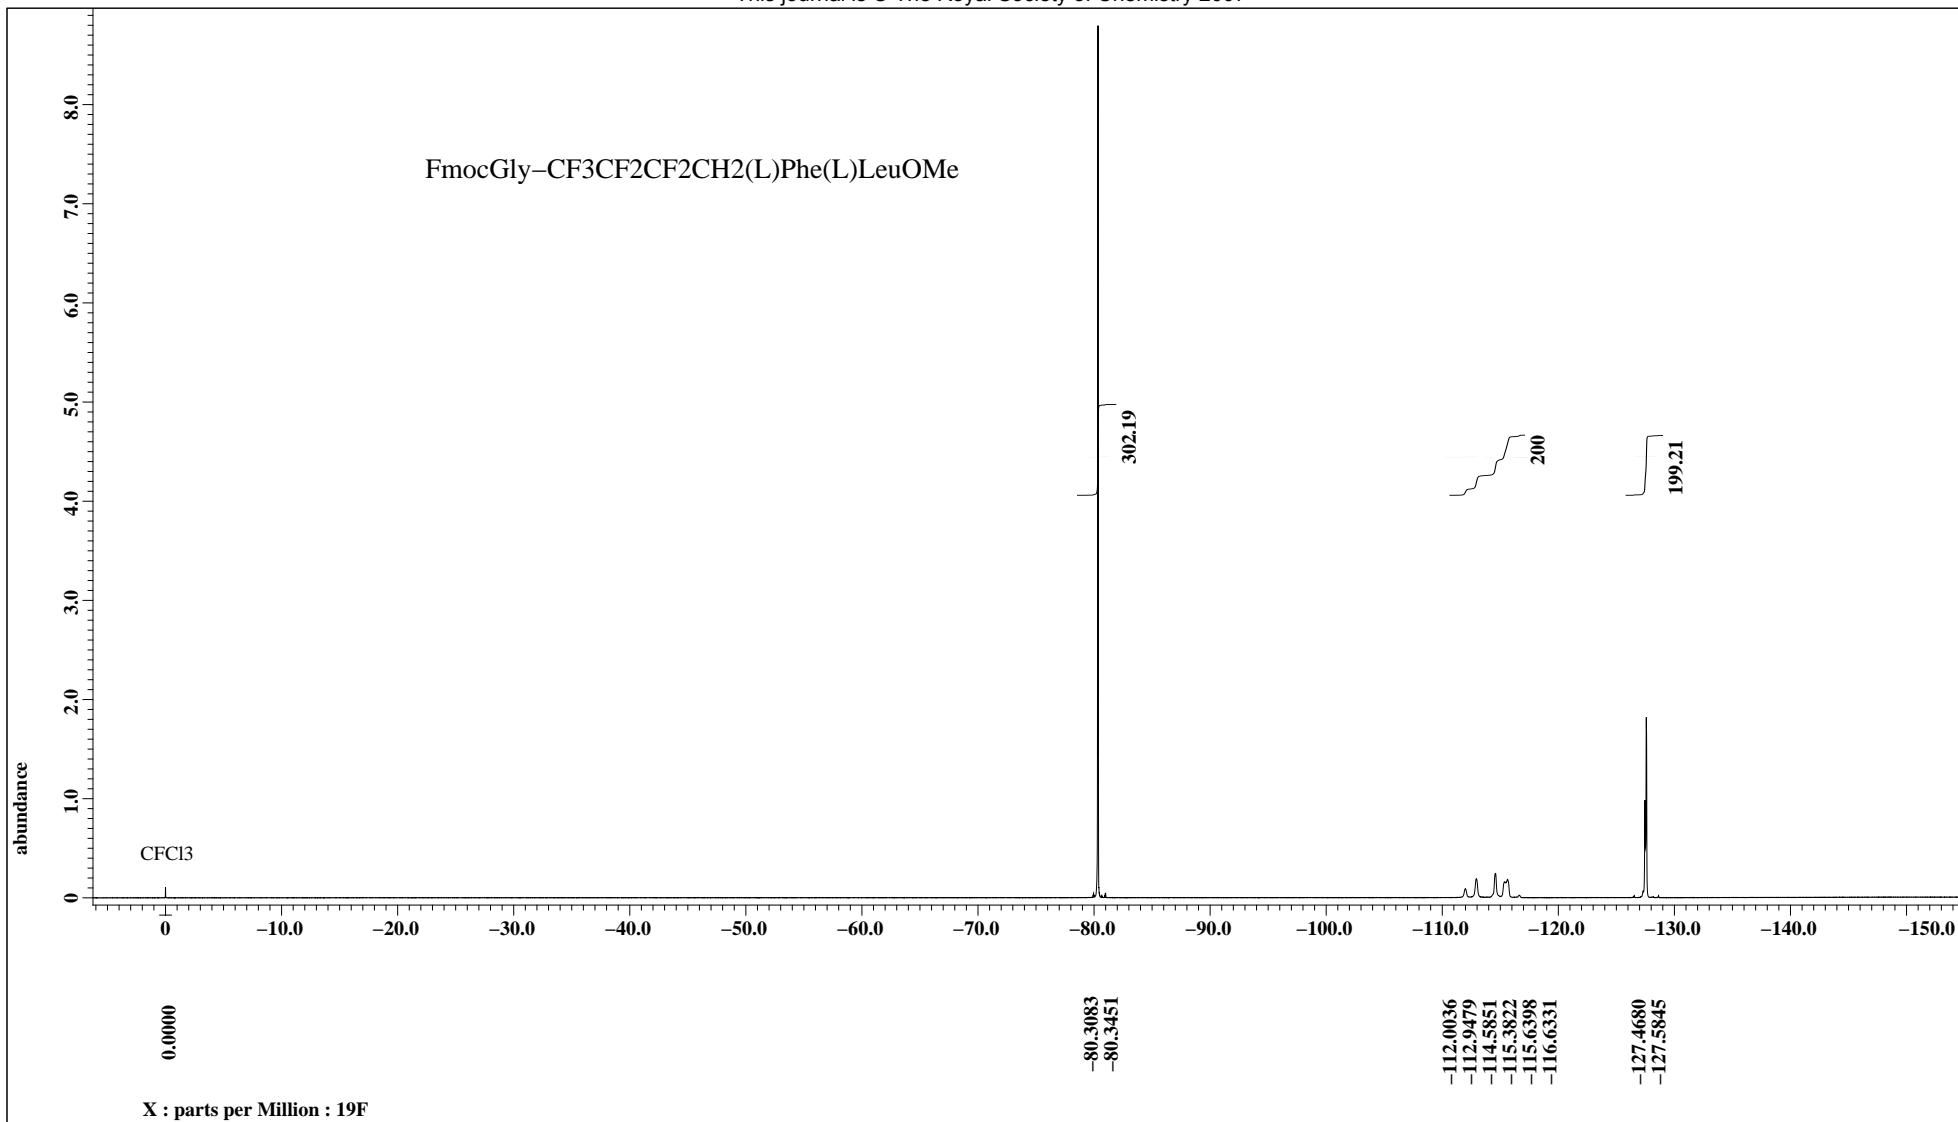

|               |                         |                |                          |                  |                |
|---------------|-------------------------|----------------|--------------------------|------------------|----------------|
| Filename      | = Lu_FmocGly-CF3CF2CF2C | Field_strength | = 7.0586013[T] (300[MHz] | Total_scans      | = 32           |
| Author        | = Delta                 | X_acq_duration | = 0.5767168[s]           | X_90_width       | = 12.2[us]     |
| Experiment    | = single_pulse.ex2      | X_domain       | = 19F                    | X_acq_time       | = 0.5767168[s] |
| Sample_id     | = 1                     | X_freq         | = 282.78036857[MHz]      | X_angle          | = 45[deg]      |
| Solvent       | = ACETONE-D6            | X_offset       | = -75[ppm]               | X_atn            | = 3[dB]        |
| Creation_time | = 2-JUL-2007 16:13:20   | X_points       | = 32768                  | X_pulse          | = 6.1[us]      |
| Revision_time | = 6-AUG-2007 16:30:50   | X_prescans     | = 1                      | Irr_mode         | = Off          |
| Current_time  | = 6-AUG-2007 16:31:29   | X_resolution   | = 1.7339533[Hz]          | Tri_mode         | = Off          |
| Comment       | = single_pulse          | X_sweep        | = 56.81818182[kHz]       | Dante_presat     | = FALSE        |
| Data_format   | = 1D_COMPLEX            | Irr_domain     | = 19F                    | Initial_wait     | = 1[s]         |
| Dim_size      | = 26214                 | Irr_freq       | = 282.78036857[MHz]      | Recvr_gain       | = 36           |
| Dim_title     | = 19F                   | Irr_offset     | = 5[ppm]                 | Relaxation_delay | = 2[s]         |
| Dim_units     | = [ppm]                 | Tri_domain     | = 19F                    | Repetition_time  | = 2.5767168[s] |
| Dimensions    | = X                     | Tri_freq       | = 282.78036857[MHz]      | Temp_get         | = 20.9[dC]     |
| Site          | = ECX 300               | Tri_offset     | = 5[ppm]                 |                  |                |
| Spectrometer  | = DELTA2_NMR            | Clipped        | = FALSE                  |                  |                |
|               |                         | Mod_return     | = 1                      |                  |                |
|               |                         | Scans          | = 32                     |                  |                |



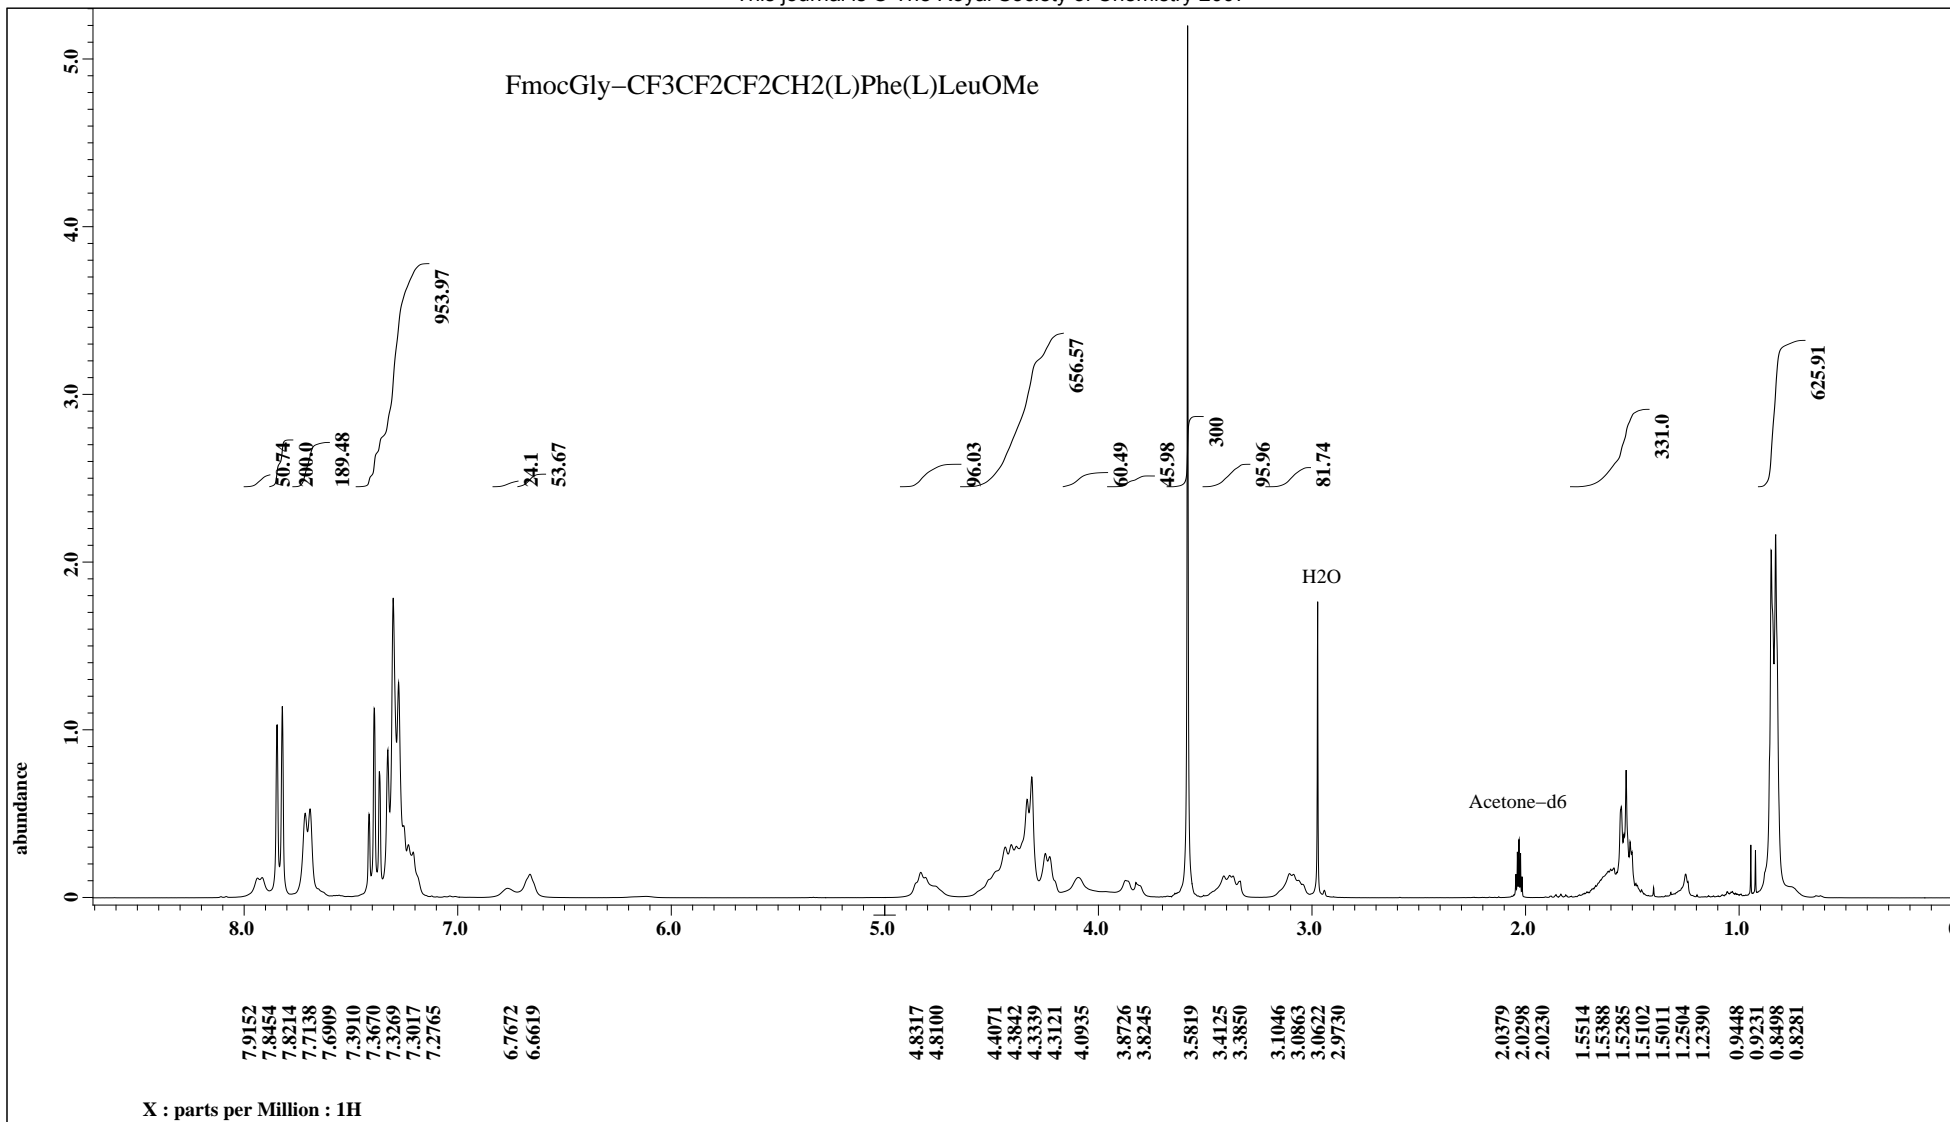

Filename = Lu\_FmocGly-CF<sub>3</sub>CF<sub>2</sub>CF<sub>2</sub>C  
 Author = Delta  
 Experiment = single\_pulse.ex2  
 Sample\_id = 1  
 Solvent = ACETONE-D6  
 Creation\_time = 2-JUL-2007 16:18:08  
 Revision\_time = 6-AUG-2007 16:24:44  
 Current\_time = 6-AUG-2007 16:25:16  
 Comment = single\_pulse  
 Data\_format = 1D\_COMPLEX  
 Dim\_size = 13107  
 Dim\_title = 1H  
 Dim\_units = [ppm]  
 Dimensions = X  
 Site = ECX 300  
 Spectrometer = DELTA2\_NMR

Field\_strength = 7.0586013[T] (300[MHz]  
 X\_acq\_duration = 2.90717696[s]  
 X\_domain = 1H  
 X\_freq = 300.52965592[MHz]  
 X\_offset = 5[ppm]  
 X\_points = 16384  
 X\_prescans = 1  
 X\_resolution = 0.34397631[Hz]  
 X\_sweep = 5.63570784[kHz]  
 Irr\_domain = 1H  
 Irr\_freq = 300.52965592[MHz]  
 Irr\_offset = 5[ppm]  
 Tri\_domain = 1H  
 Tri\_freq = 300.52965592[MHz]  
 Tri\_offset = 5[ppm]  
 Clipped = FALSE  
 Mod\_return = 1  
 Scans = 32

Total\_scans = 32  
 X\_90\_width = 13.3[us]  
 X\_acq\_time = 2.90717696[s]  
 X\_angle = 45[deg]  
 X\_atn = 3[dB]  
 X\_pulse = 6.65[us]  
 Irr\_mode = Off  
 Tri\_mode = Off  
 Dante\_presat = FALSE  
 Initial\_wait = 1[s]  
 Recvr\_gain = 30  
 Relaxation\_delay = 2[s]  
 Repetition\_time = 4.90717696[s]  
 Temp\_get = 20.9[dC]



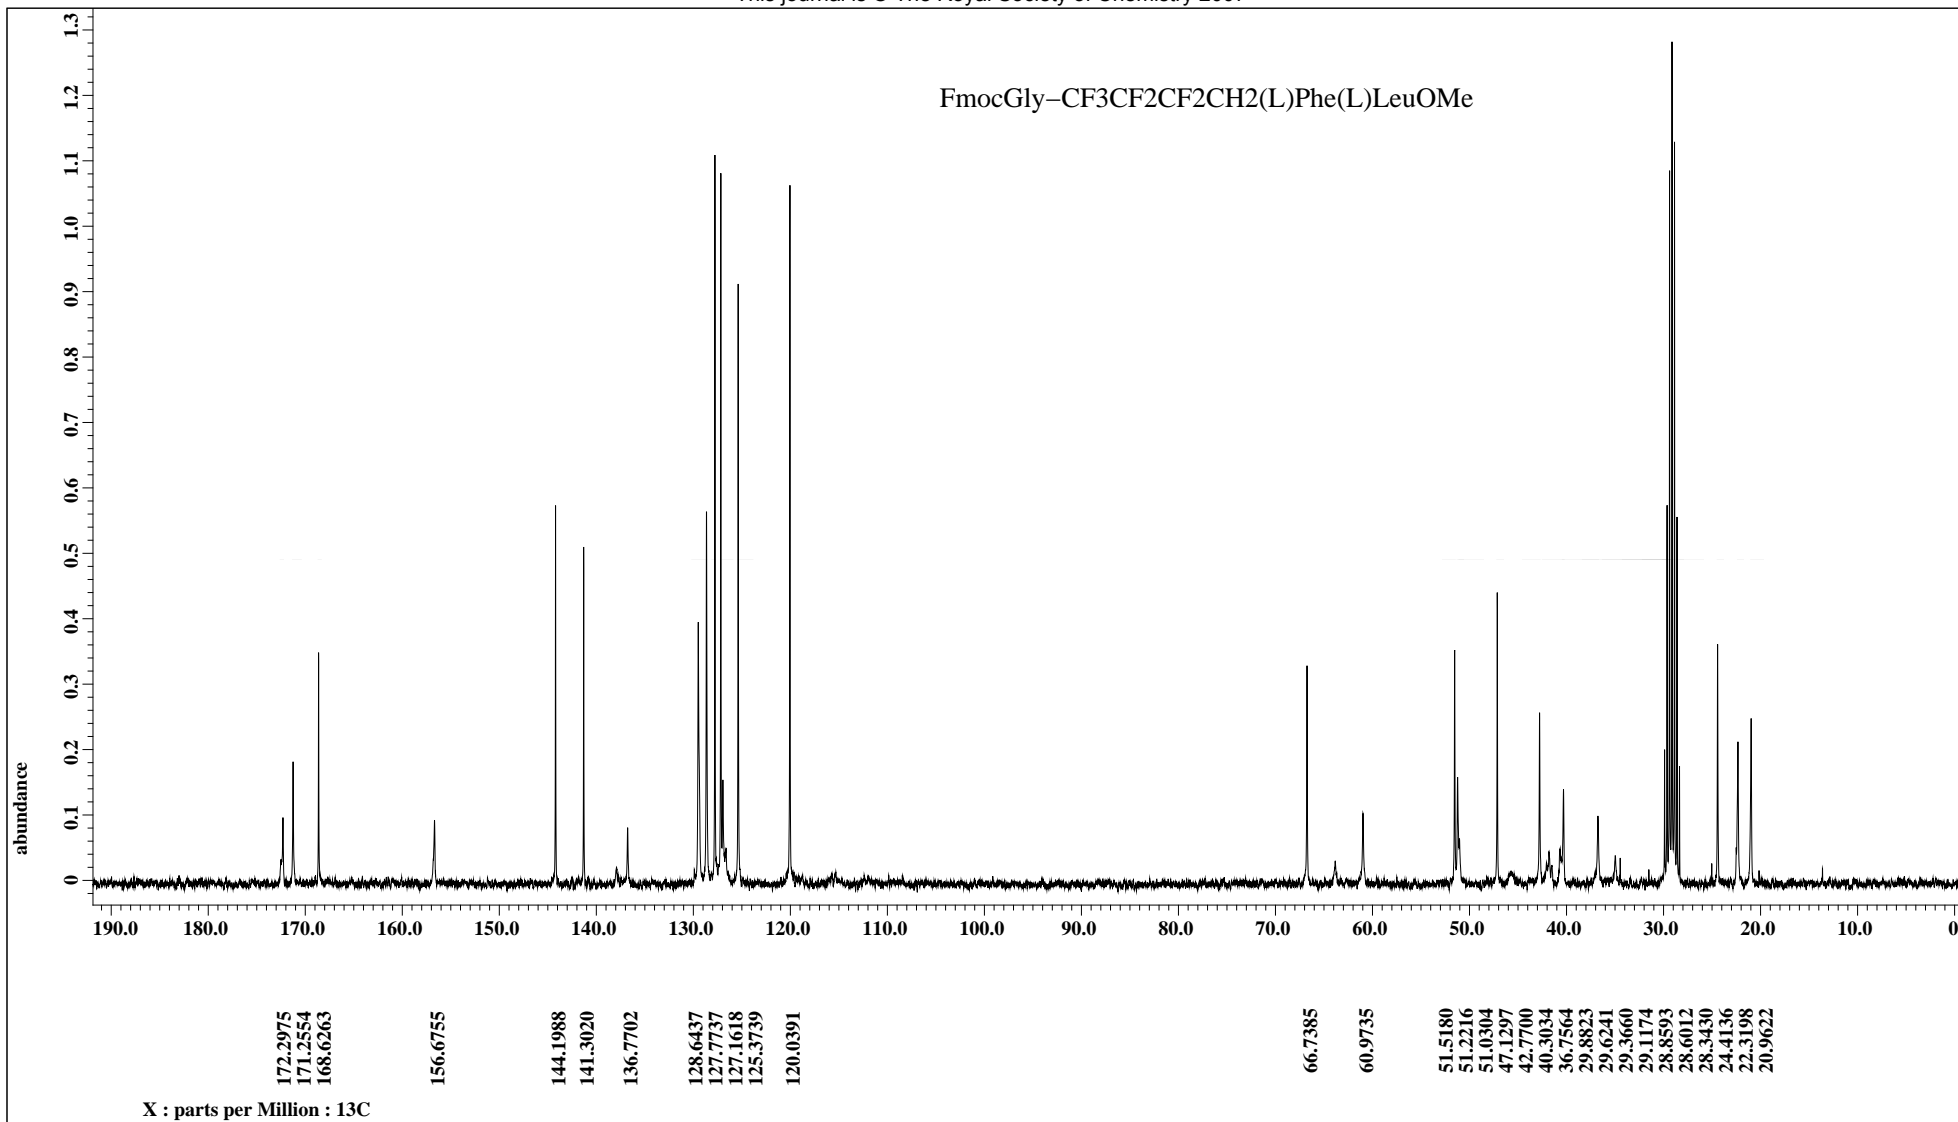

Filename = Lu\_FmocGly-CF<sub>3</sub>CF<sub>2</sub>CF<sub>2</sub>C  
 Author = Delta  
 Experiment = single\_pulse\_dec  
 Sample\_id = 1  
 Solvent = ACETONE-D<sub>6</sub>  
 Creation\_time = 10-JUL-2007 18:53:52  
 Revision\_time = 6-AUG-2007 16:51:09  
 Current\_time = 6-AUG-2007 16:51:38  
 Comment = single pulse decouple  
 Data\_format = 1D\_COMPLEX  
 Dim\_size = 26214  
 Dim\_title = 13C  
 Dim\_units = [ppm]  
 Dimensions = X  
 Site = ECX 300  
 Spectrometer = DELTA2\_NMR

Field\_strength = 7.0586013[T] (300[MHz]  
 X\_acq\_duration = 1.38412032[s]  
 X\_domain = 13C  
 X\_freq = 75.56823426[MHz]  
 X\_offset = 100[ppm]  
 X\_points = 32768  
 X\_prescans = 4  
 X\_resolution = 0.72248054[Hz]  
 X\_sweep = 23.67424242[kHz]  
 Irr\_domain = 1H  
 Irr\_freq = 300.52965592[MHz]  
 Irr\_offset = 5[ppm]  
 Mod\_return = 1  
 Scans = 454  
 Total\_scans = 454  
 X\_90\_width = 14.05[us]

X\_acq\_time = 1.38412032[s]  
 X\_angle = 30[deg]  
 X\_atn = 6[dB]  
 X\_pulse = 4.68333333[us]  
 Irr\_atn\_dec = 22[dB]  
 Irr\_atn\_noe = 22[dB]  
 Irr\_noise = WALTZ  
 Decoupling = TRUE  
 Initial\_wait = 1[s]  
 Noe = TRUE  
 Noe\_time = 2[s]  
 Recvr\_gain = 60  
 Relaxation\_delay = 2[s]  
 Repetition\_time = 3.38412032[s]  
 Temp\_get = 20.9[dC]



## 9. HRMS and NMR spectra of **5**

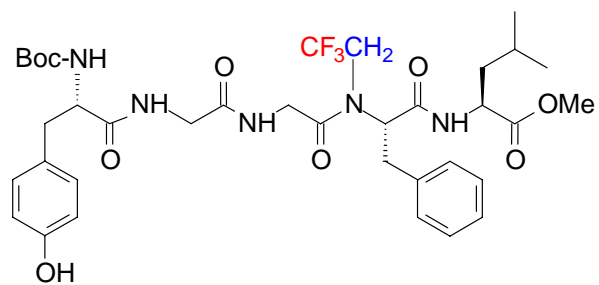

**5**

Single Mass Analysis

Tolerance = 10.0 PPM / DBE: min = -1.5, max = 100.0

Selected filters: None

Monoisotopic Mass, Even Electron Ions

410 formula(e) evaluated with 4 results within limits (all results (up to 1000) for each mass)

Elements Used:

C: 0-50 H: 0-80 N: 2-6 O: 5-10 F: 3-3 Na: 0-1

Changqing Lu, Lu\_06

Mass Spec Lab, SCS, University of Illinois

Qtof\_17795 19 (1.364) AM (Cen,3, 80.00, Ar,12000.0,716.46,0.70,LS 3); Sm (SG, 2x5.00)

Q-tof  
1: TOF MS ES+  
1.26e3

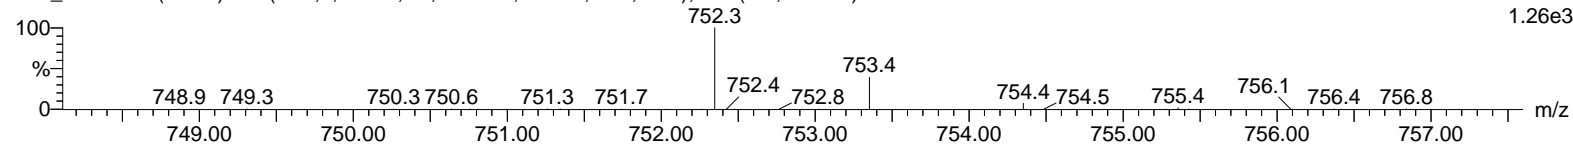

Minimum: -1.5  
Maximum: 5.0 10.0 100.0

| Mass     | Calc. Mass | mDa  | PPM  | DBE  | i-FIT | Formula             |
|----------|------------|------|------|------|-------|---------------------|
| 752.3472 | 752.3482   | -1.0 | -1.3 | 13.5 | 10.7  | C36 H49 N5 O9 F3    |
|          | 752.3458   | 1.4  | 1.9  | 10.5 | 6.1   | C34 H50 N5 O9 F3 Na |
|          | 752.3499   | -2.7 | -3.6 | 14.5 | 15.9  | C39 H50 N3 O7 F3 Na |
|          | 752.3523   | -5.1 | -6.8 | 17.5 | 24.0  | C41 H49 N3 O7 F3    |



Boc(L)TyrGlyGly-CF<sub>3</sub>CH<sub>2</sub>(L)Phe(L)LeuOMe

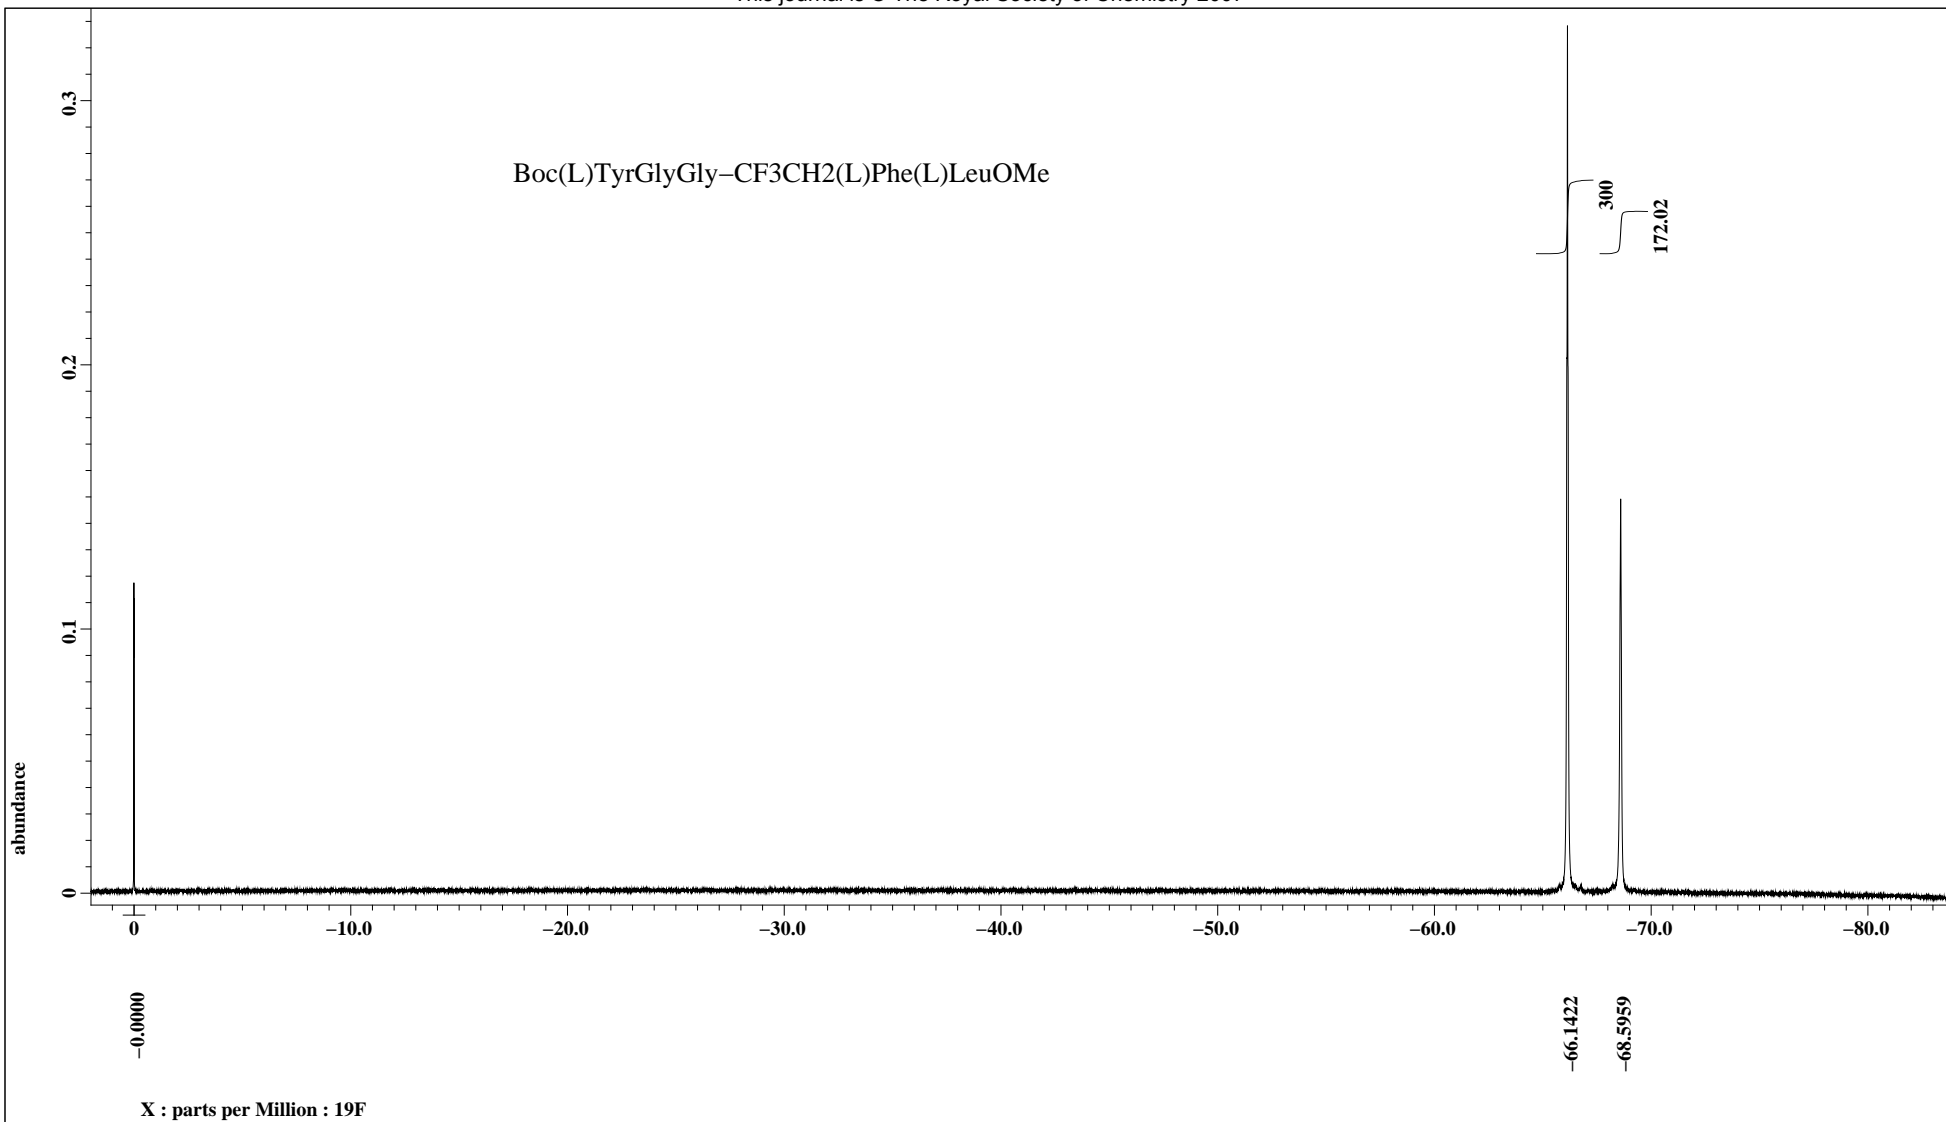

|               |                         |                |                          |                  |                 |
|---------------|-------------------------|----------------|--------------------------|------------------|-----------------|
| Filename      | = Lu_Boc(L)TyrGlyGly-CF | Field_strength | = 7.0586013[T] (300[MHz] | Total_scans      | = 64            |
| Author        | = Delta                 | X_acq_duration | = 1.02760448[s]          | X_90_width       | = 12.2[us]      |
| Experiment    | = single_pulse.ex2      | X_domain       | = 19F                    | X_acq_time       | = 1.02760448[s] |
| Sample_id     | = 1                     | X_freq         | = 282.78036857[MHz]      | X_angle          | = 45[deg]       |
| Solvent       | = ACETONE-D6            | X_offset       | = -40[ppm]               | X_atn            | = 3[dB]         |
| Creation_time | = 1-JUL-2007 20:43:57   | X_points       | = 32768                  | X_pulse          | = 6.1[us]       |
| Revision_time | = 6-AUG-2007 14:48:22   | X_prescans     | = 1                      | Irr_mode         | = Off           |
| Current_time  | = 6-AUG-2007 14:49:46   | X_resolution   | = 0.97313706[Hz]         | Tri_mode         | = Off           |
| Comment       | = single_pulse          | X_sweep        | = 31.8877551[kHz]        | Dante_presat     | = FALSE         |
| Data_format   | = 1D_COMPLEX            | Irr_domain     | = 19F                    | Initial_wait     | = 1[s]          |
| Dim_size      | = 26214                 | Irr_freq       | = 282.78036857[MHz]      | Recvr_gain       | = 40            |
| Dim_title     | = 19F                   | Irr_offset     | = 5[ppm]                 | Relaxation_delay | = 2[s]          |
| Dim_units     | = [ppm]                 | Tri_domain     | = 19F                    | Repetition_time  | = 3.02760448[s] |
| Dimensions    | = X                     | Tri_freq       | = 282.78036857[MHz]      | Temp_get         | = 21.3[dC]      |
| Site          | = ECX 300               | Tri_offset     | = 5[ppm]                 |                  |                 |
| Spectrometer  | = DELTA2_NMR            | Clipped        | = FALSE                  |                  |                 |
|               |                         | Mod_return     | = 1                      |                  |                 |
|               |                         | Scans          | = 64                     |                  |                 |



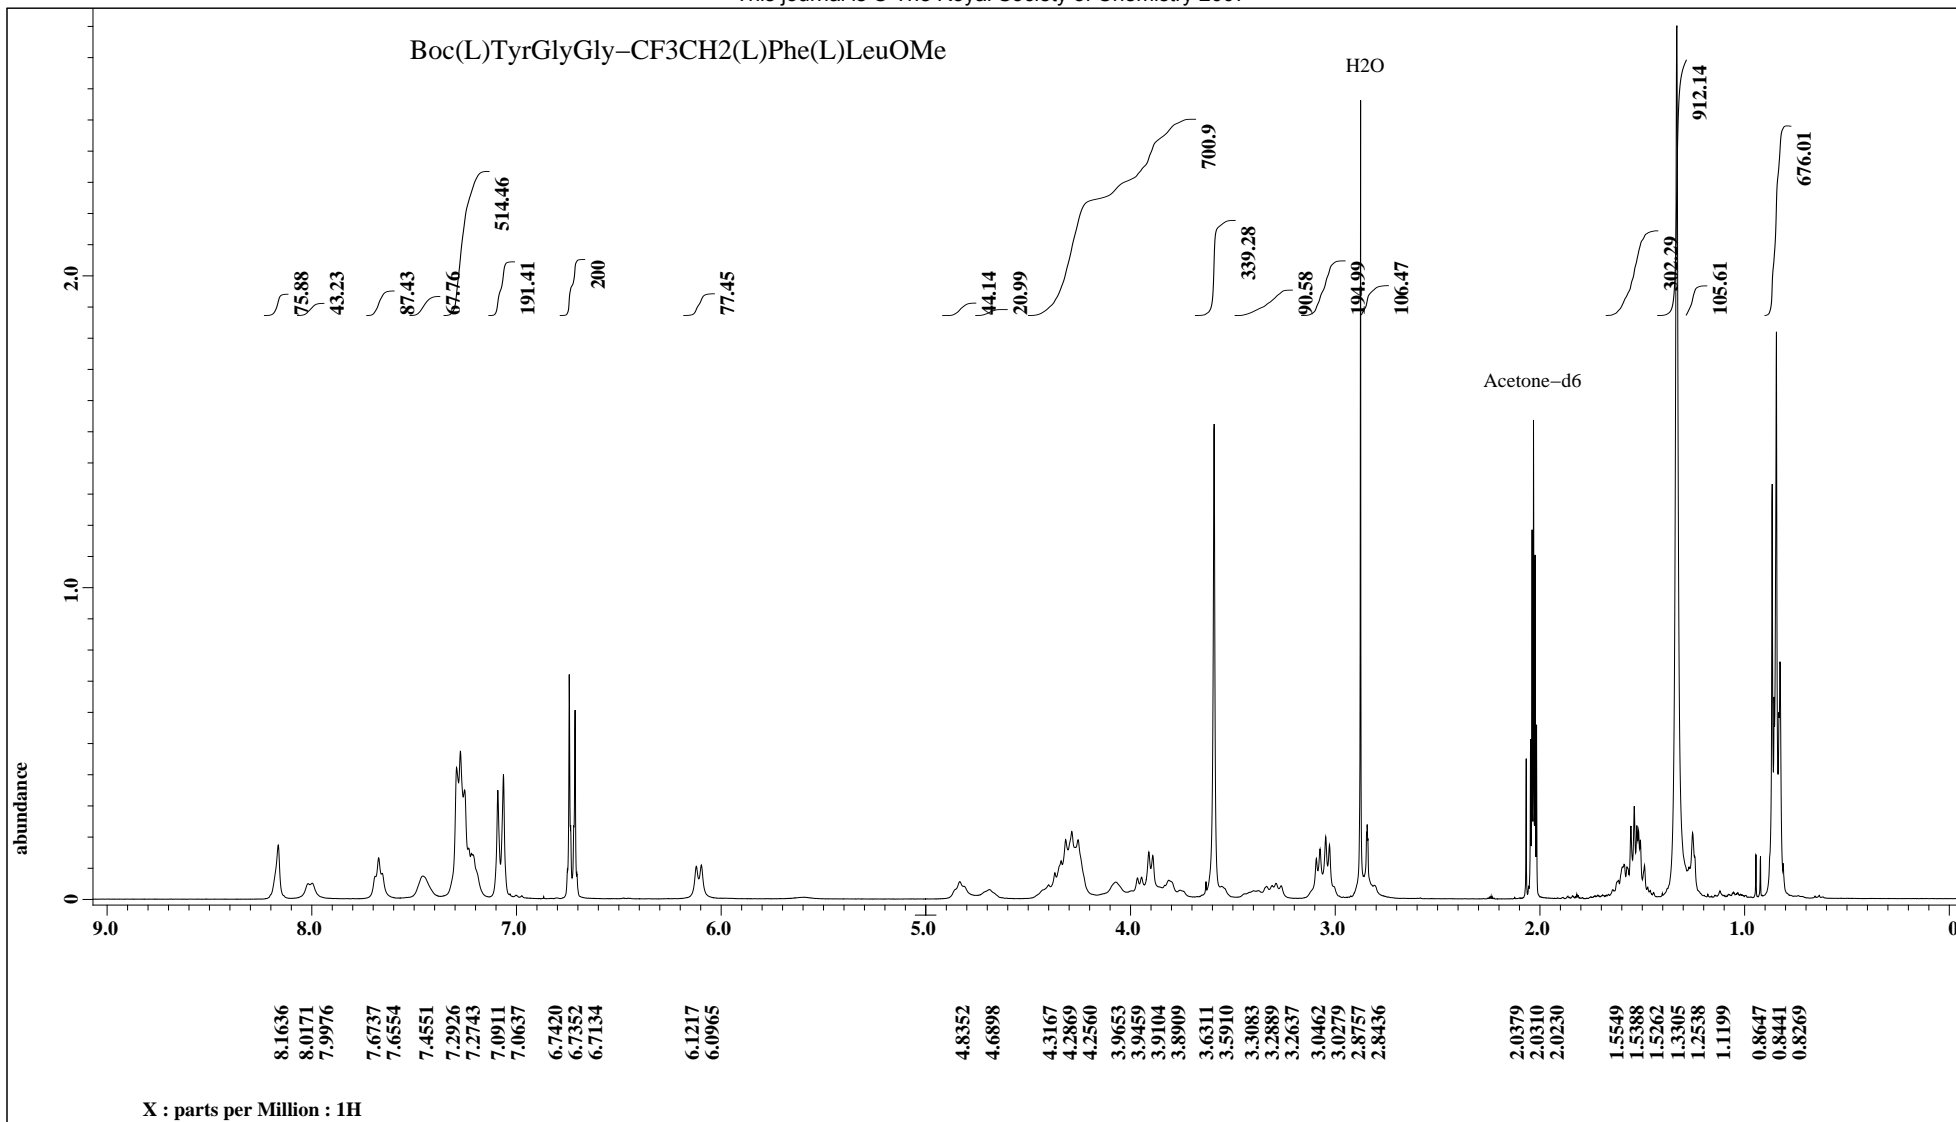

|               |                         |                |                          |                  |                 |
|---------------|-------------------------|----------------|--------------------------|------------------|-----------------|
| Filename      | = Lu_Boc(L)TyrGlyGly-CF | Field strength | = 7.0586013[T] (300[MHz] | Total_scans      | = 32            |
| Author        | = Delta                 | X_acq_duration | = 2.90717696[s]          | X_90_width       | = 13.3[us]      |
| Experiment    | = single_pulse.ex2      | X_domain       | = 1H                     | X_acq_time       | = 2.90717696[s] |
| Sample_id     | = 1                     | X_freq         | = 300.52965592[MHz]      | X_angle          | = 45[deg]       |
| Solvent       | = ACETONE-D6            | X_offset       | = 5[ppm]                 | X_atn            | = 3[dB]         |
| Creation_time | = 1-JUL-2007 20:36:12   | X_points       | = 16384                  | X_pulse          | = 6.65[us]      |
| Revision_time | = 6-AUG-2007 15:02:21   | X_prescans     | = 1                      | Irr_mode         | = Off           |
| Current_time  | = 6-AUG-2007 15:03:01   | X_resolution   | = 0.34397631[Hz]         | Tri_mode         | = Off           |
| Comment       | = single_pulse          | X_sweep        | = 5.63570784[kHz]        | Dante_presat     | = FALSE         |
| Data_format   | = 1D_COMPLEX            | Irr_domain     | = 1H                     | Initial_wait     | = 1[s]          |
| Dim_size      | = 13107                 | Irr_freq       | = 300.52965592[MHz]      | Recvr_gain       | = 40            |
| Dim_title     | = 1H                    | Irr_offset     | = 5[ppm]                 | Relaxation_delay | = 2[s]          |
| Dim_units     | = [ppm]                 | Tri_domain     | = 1H                     | Repetition_time  | = 4.90717696[s] |
| Dimensions    | = X                     | Tri_freq       | = 300.52965592[MHz]      | Temp_get         | = 21.2[dC]      |
| Site          | = ECX 300               | Tri_offset     | = 5[ppm]                 |                  |                 |
| Spectrometer  | = DELTA2_NMR            | Clipped        | = FALSE                  |                  |                 |
|               |                         | Mod_return     | = 1                      |                  |                 |
|               |                         | Scans          | = 32                     |                  |                 |



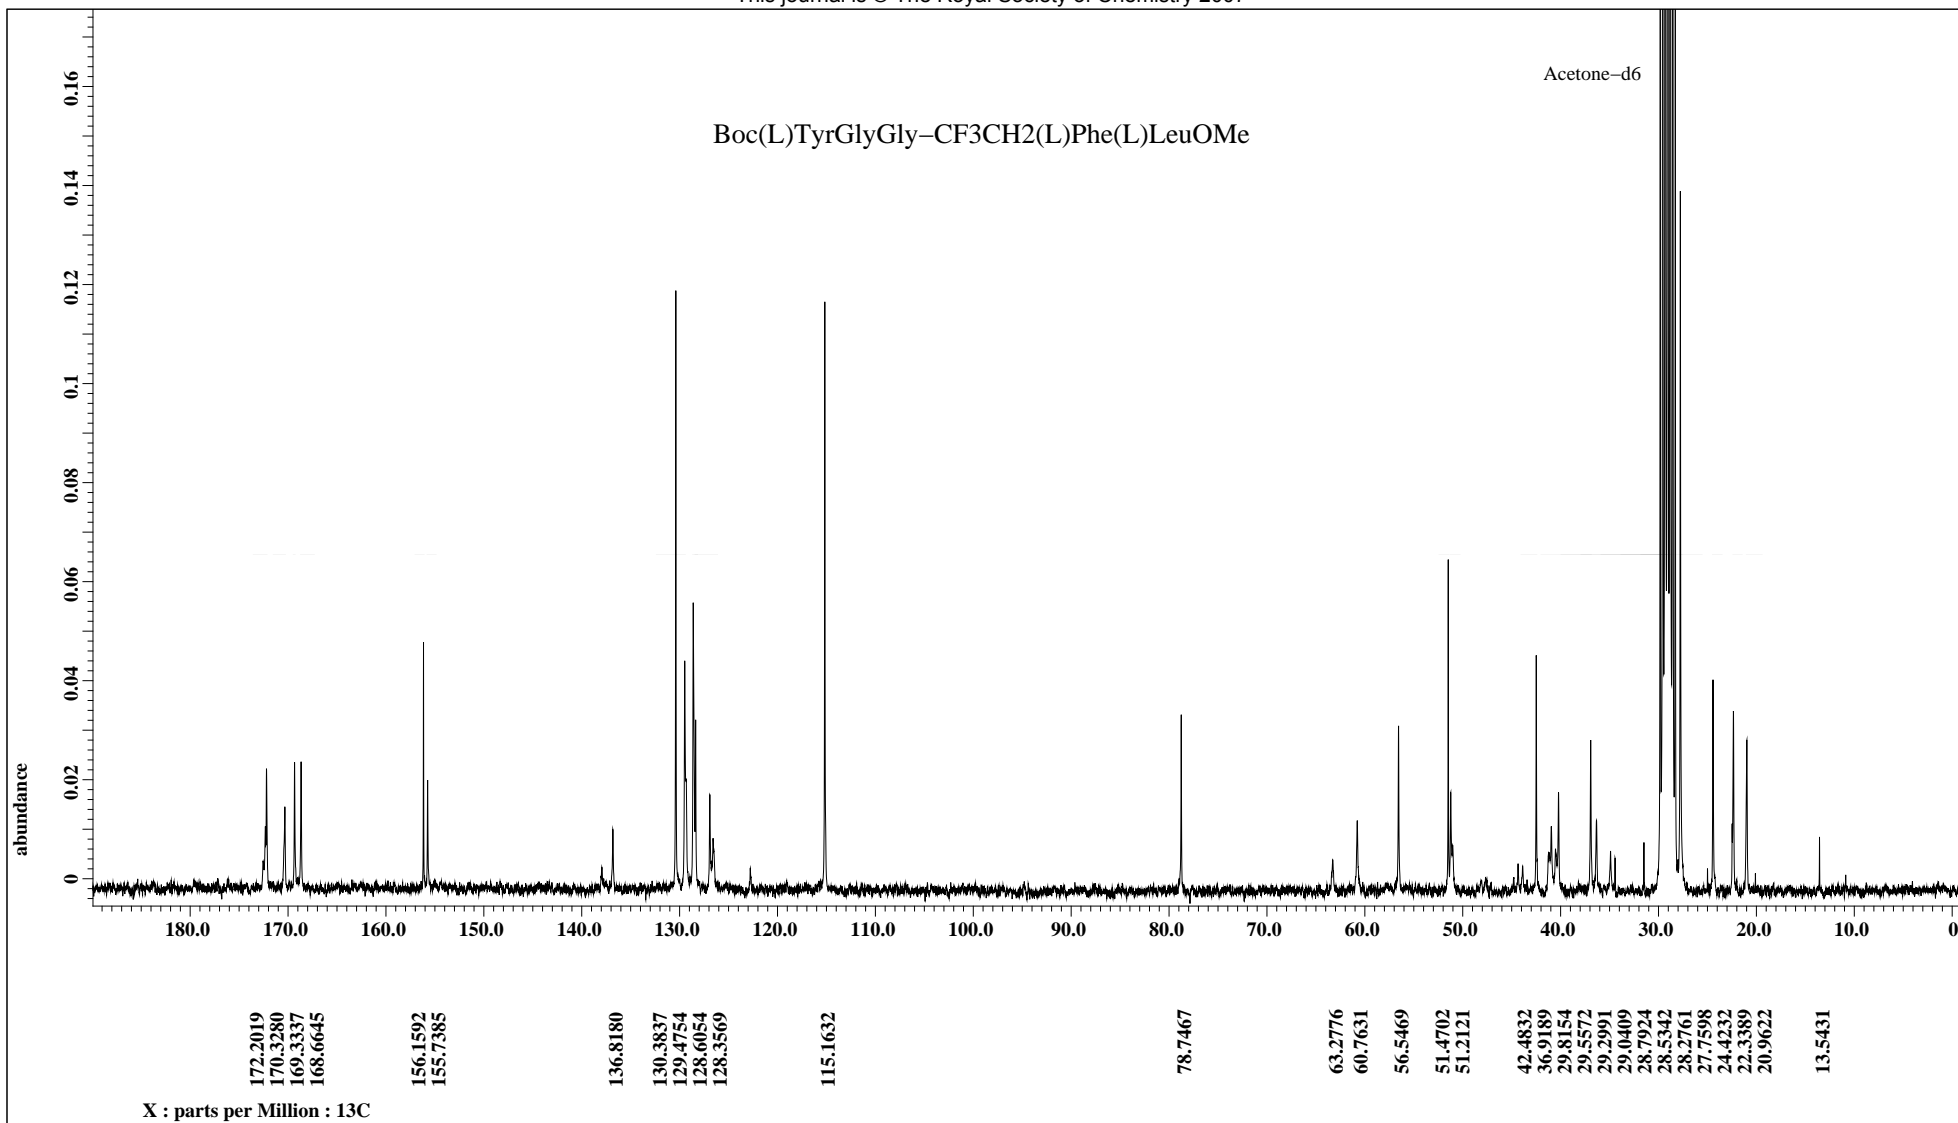

Filename = Lu\_Boc(L)TyrGlyGlyCF3  
 Author = Delta  
 Experiment = single\_pulse\_dec  
 Sample\_id = 1  
 Solvent = ACETONE-D6  
 Creation\_time = 7-JUL-2007 11:57:29  
 Revision\_time = 6-AUG-2007 15:14:30  
 Current\_time = 6-AUG-2007 15:15:08  
 Comment = single pulse decouple  
 Data\_format = 1D\_COMPLEX  
 Dim\_size = 26214  
 Dim\_title = 13C  
 Dim\_units = [ppm]  
 Dimensions = X  
 Site = ECX 300  
 Spectrometer = DELTA2\_NMR

Field\_strength = 7.0586013[T] (300[MHz]  
 X\_acq\_duration = 1.38412032[s]  
 X\_domain = 13C  
 X\_freq = 75.56823426[MHz]  
 X\_offset = 100[ppm]  
 X\_points = 32768  
 X\_prescans = 4  
 X\_resolution = 0.72248054[Hz]  
 X\_sweep = 23.67424242[kHz]  
 Irr\_domain = 1H  
 Irr\_freq = 300.52965592[MHz]  
 Irr\_offset = 5[ppm]  
 Clipped = TRUE  
 Mod\_return = 1  
 Scans = 16405  
 Total\_scans = 16405  
 X\_90\_width = 14.05[us]

X\_acq\_time = 1.38412032[s]  
 X\_angle = 30[deg]  
 X\_atn = 6[dB]  
 X\_pulse = 4.68333333[us]  
 Irr\_atn\_dec = 22[dB]  
 Irr\_atn\_noe = 22[dB]  
 Irr\_noise = WALTZ  
 Decoupling = TRUE  
 Initial\_wait = 1[s]  
 Noe = TRUE  
 Noe\_time = 2[s]  
 Recvr\_gain = 60  
 Relaxation\_delay = 2[s]  
 Repetition\_time = 3.38412032[s]  
 Temp\_get = 21.7[°C]



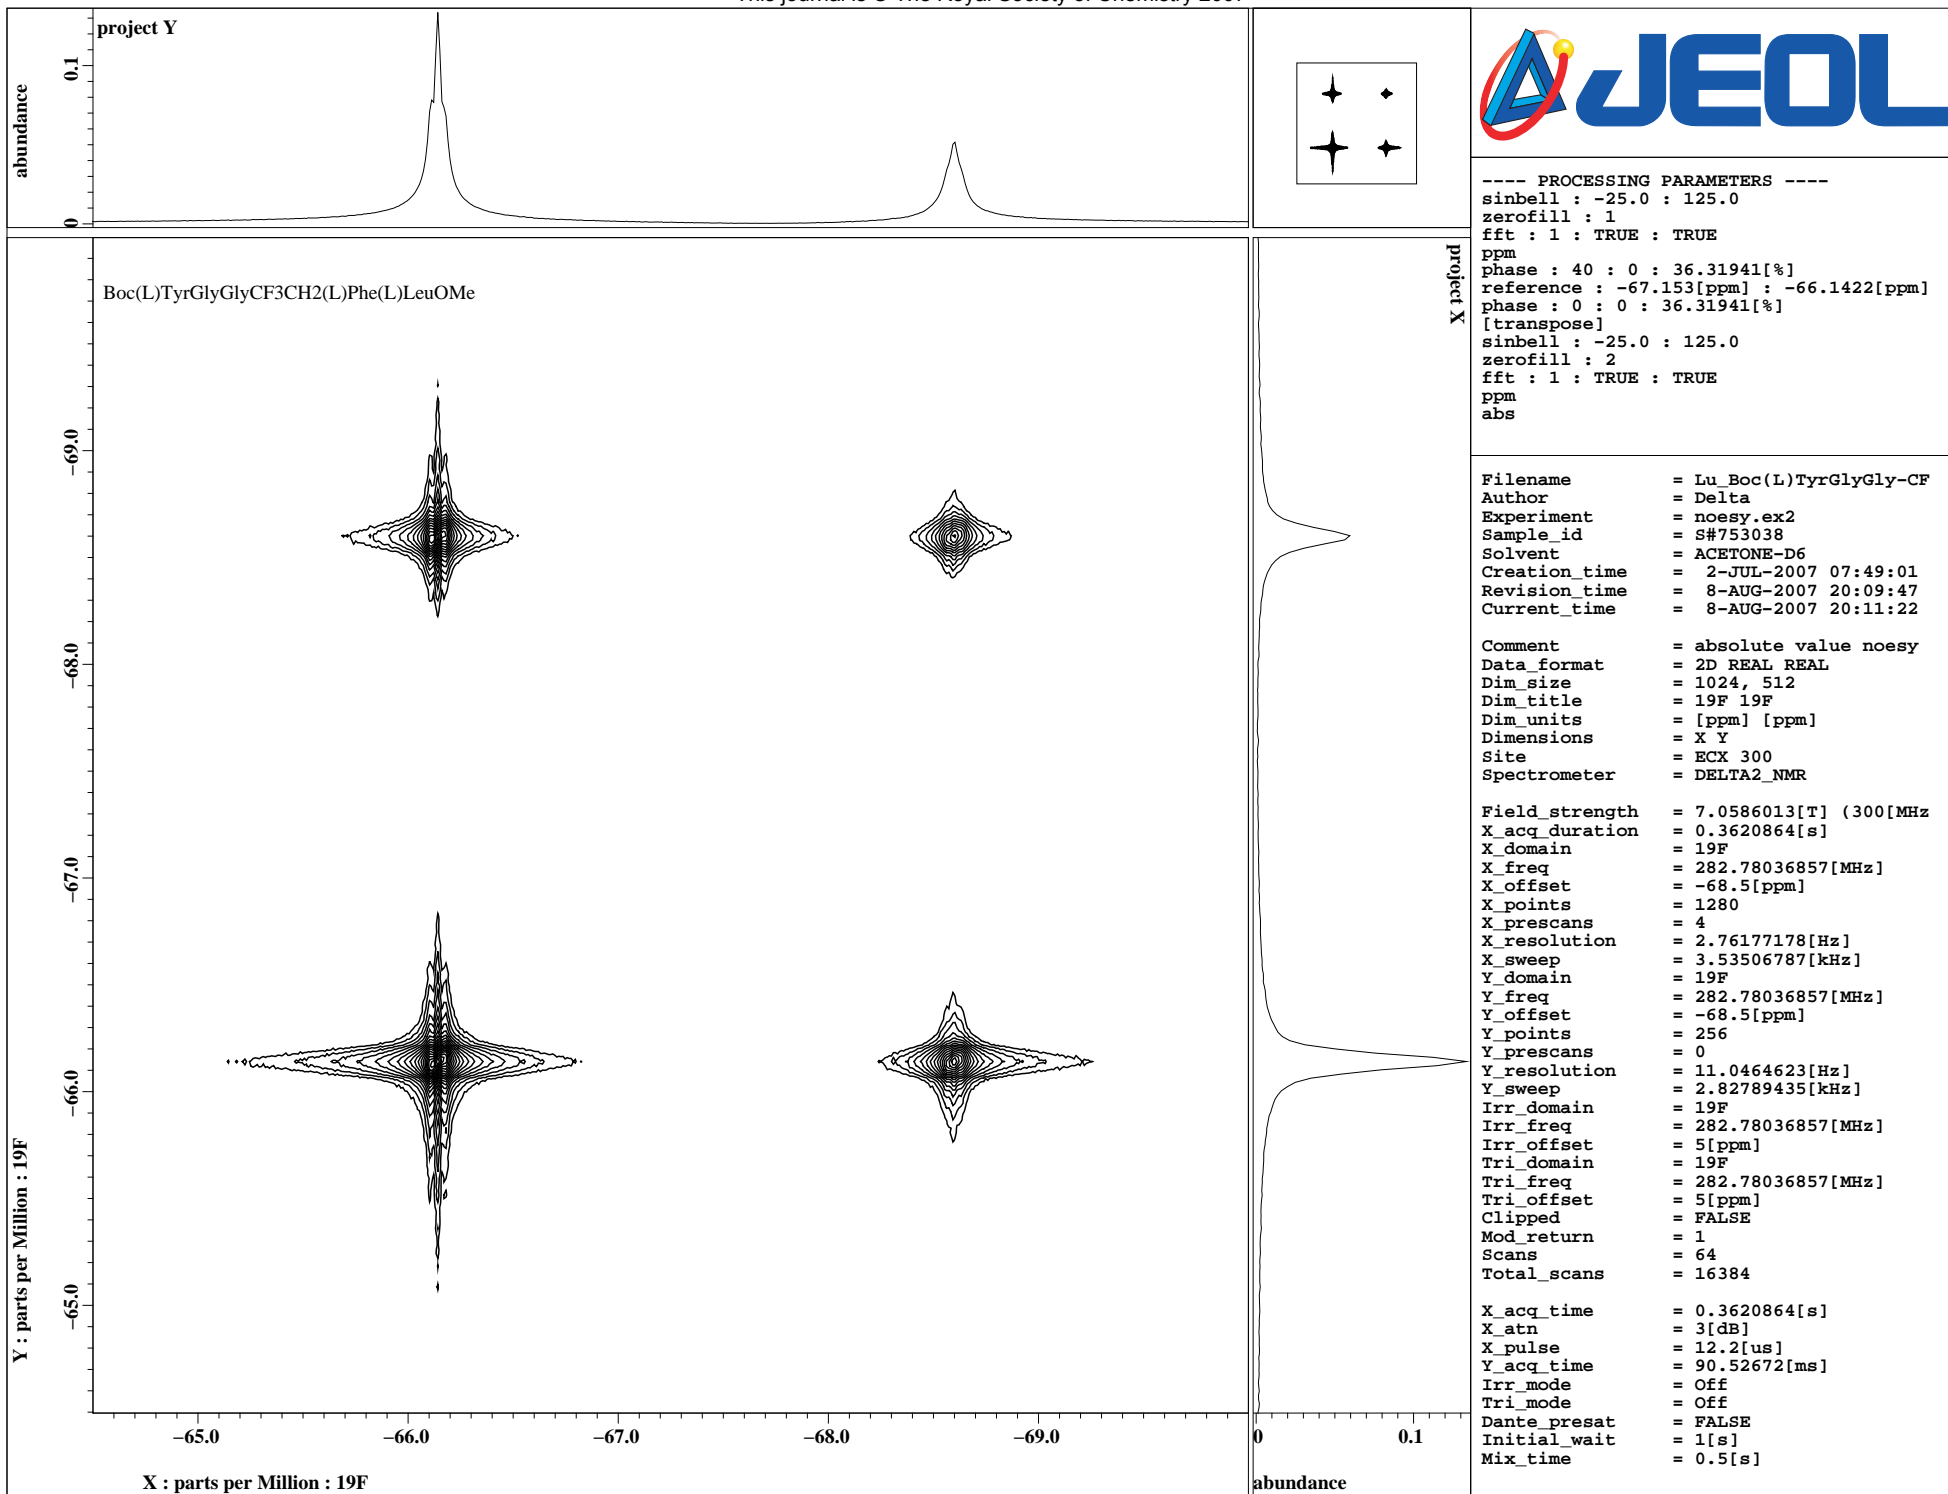

Supplement: b712617d.pdf [file b712617d.pdf]
